# Supplementary material for: Parallel mechanochemical optimization – Buchwald–Hartwig C–N coupling as a test case
Source: Royal Society of Chemistry journal article supplement (doi:10.1039/d2gc01460b), 2022-01-01

Supplementary information

**Parallel mechanochemical optimization - Buchwald-Hartwig C-N coupling  
as a test case**

Q. Lemesre, T. Wiesner, R. Wiechert, E. Rodrigo, S. Triebel, and H. Geneste\*

AbbVie Deutschland GmbH & Co. KG, Neuroscience Research, Knollstr., D-67061 Ludwigshafen,  
Germany

**Table of contents**

|                                                                        |    |
|------------------------------------------------------------------------|----|
| <b>Tables &amp; Schemes</b> .....                                      | 2  |
| <b>1. General information</b> .....                                    | 3  |
| <b>2. General procedure</b> .....                                      | 4  |
| <b>3. Characterization of compounds</b> .....                          | 4  |
| <b>4. Copies of <sup>1</sup>H and <sup>13</sup>C NMR spectra</b> ..... | 12 |

**Table S1.** Experimental data table.

| entry     | Compound  | X  | state <sup>a</sup> |         | 3-step cascade <sup>b</sup> | NMR-yield <sup>c</sup> (%) |                 |      |            | isol. yield (%)     |                  |
|-----------|-----------|----|--------------------|---------|-----------------------------|----------------------------|-----------------|------|------------|---------------------|------------------|
|           |           |    | ArX / amine        | Product |                             | 1 <sup>st</sup>            | 2 <sup>nd</sup> | mean | $\Delta^d$ | AbbVie <sup>e</sup> | Lit.             |
| <b>1</b>  | <b>1</b>  | Br | L / S              | S       | neat                        | 79                         |                 | 79   |            |                     | 85 <sup>3a</sup> |
| <b>2</b>  |           |    |                    |         | H <sub>2</sub> O            | 91                         | 99              | 95   | 8          | 85                  |                  |
| <b>3</b>  | <b>2a</b> | Br | S / L              | S       | neat                        | 26                         | 35              | 31   | 9          |                     |                  |
| <b>4</b>  |           |    |                    |         | H <sub>2</sub> O            | 89                         | 100             | 95   | 11         |                     |                  |
| <b>5</b>  | <b>2b</b> | Cl | S / L              | S       | neat                        | 8                          | 10              | 9    | 2          |                     |                  |
| <b>6</b>  |           |    |                    |         | H <sub>2</sub> O            | 24                         | 30              | 27   | 6          |                     |                  |
| <b>7</b>  |           |    |                    |         | MeOH                        | 64                         | 76              | 70   | 12         |                     |                  |
| <b>8</b>  |           |    |                    |         | sand                        | 94                         | 96              | 95   | 2          |                     |                  |
| <b>9</b>  | <b>3</b>  | Cl | L / L              | L       | neat                        | 1                          |                 | 1    |            |                     |                  |
| <b>10</b> |           |    |                    |         | H <sub>2</sub> O            | 8                          |                 | 8    |            |                     |                  |
| <b>11</b> |           |    |                    |         | MeOH                        | 85                         | 89              | 87   | 4          |                     |                  |
| <b>12</b> |           |    |                    |         | sand                        | 88                         | 93              | 91   | 5          |                     |                  |
| <b>13</b> | <b>4</b>  | Cl | L / L              | L       | neat                        | 34                         | 42              | 38   | 8          |                     |                  |
| <b>14</b> |           |    |                    |         | H <sub>2</sub> O            | 1                          |                 | 1    |            |                     |                  |
| <b>15</b> |           |    |                    |         | MeOH                        | 39                         | 49              | 44   | 10         |                     |                  |
| <b>16</b> |           |    |                    |         | sand                        | 68                         | 60              | 64   | 8          |                     |                  |
| <b>17</b> | <b>5</b>  | Cl | L / L              | L       | neat                        | 76                         | 75              | 76   | 1          |                     |                  |
| <b>18</b> | <b>6</b>  | Cl | S / L              | S       | neat                        | 93                         | 91              | 92   | 2          | 77                  | 77 <sup>3a</sup> |
| <b>19</b> |           |    |                    |         | H <sub>2</sub> O            | 27                         |                 | 27   |            |                     |                  |
| <b>20</b> |           |    |                    |         | MeOH                        | 60                         | 67              | 64   | 7          | 52                  |                  |
| <b>21</b> |           |    |                    |         | sand                        | 79                         | 90              | 85   | 11         |                     |                  |
| <b>22</b> | <b>7</b>  | Cl | S / L              | S       | neat                        | 35                         |                 | 35   |            |                     | 23 <sup>3a</sup> |
| <b>23</b> |           |    |                    |         | H <sub>2</sub> O            | 27                         |                 | 27   |            |                     |                  |
| <b>24</b> |           |    |                    |         | MeOH                        | 98                         | 100             | 99   | 2          | 90                  |                  |
| <b>25</b> | <b>8</b>  | Cl | L / L              | S       | neat                        | 42                         |                 | 42   |            |                     | 50 <sup>3a</sup> |
| <b>26</b> |           |    |                    |         | H <sub>2</sub> O            | 1                          |                 | 1    |            |                     |                  |
| <b>27</b> |           |    |                    |         | MeOH                        | 85                         | 95              | 90   | 10         | 79                  |                  |
| <b>28</b> | <b>9</b>  | Cl | S / S              | S       | neat                        | 50                         |                 | 50   |            |                     | 39 <sup>3a</sup> |
| <b>29</b> |           |    |                    |         | H <sub>2</sub> O            | 1                          |                 | 1    |            |                     |                  |
| <b>30</b> |           |    |                    |         | MeOH                        | 50                         | 57              | 54   | 7          |                     |                  |
| <b>31</b> |           |    |                    |         | sand                        | 84                         | 96              | 90   | 12         | 58                  |                  |
| <b>32</b> | <b>10</b> | Cl | L / L              | S       | neat                        | 58                         | 60              | 59   | 2          | 59                  | 40 <sup>3b</sup> |
| <b>33</b> | <b>11</b> | Cl | L / L              | L       | neat                        | 83                         | 92              | 88   | 9          | 63                  | 32 <sup>3b</sup> |
| <b>34</b> | <b>12</b> | Br | S / L              | S       | neat                        | 91                         | 95              | 93   | 4          | 93                  | 52 <sup>3b</sup> |
| <b>35</b> | <b>13</b> | Br | L / L              | S       | neat                        | 89                         | 89              | 89   | 0          | 74                  | 42 <sup>3b</sup> |
| <b>36</b> | <b>14</b> | Cl | S / L              | S       | neat                        | 55                         | 49              | 52   | 6          | 40                  | 51 <sup>3b</sup> |

<sup>a</sup>liquid (L), solid (S): states of the substrates and product; <sup>b</sup>additive screening (LAG & AG); <sup>c</sup>yield determined by NMR using 1,3,5-trimethoxybenzene (TMB) as internal standard; <sup>d</sup>difference between 2 measured NMR-yields; <sup>e</sup>isolated yield after chromatography and evaporation (s. general procedure below).

**Scheme S1.** Data analysis (2).

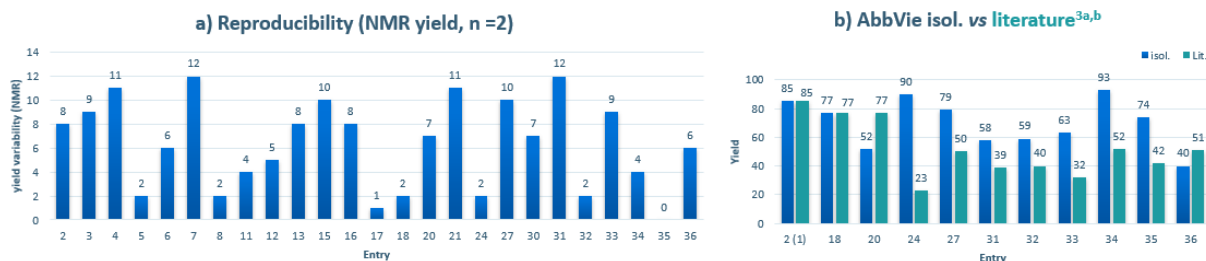

a) the yield difference between 2 NMR-yields measurements was plotted for each substrate [entries, s. Table S1 (SI)], yield determined by NMR using 1,3,5-trimethoxybenzene (TMB) as internal standard; b) AbbVie isolated yield (blue column) in comparison with the published isolated yield (green column).<sup>3a,b</sup>

**Scheme S2.** LAG & AG screening – yield improvement.

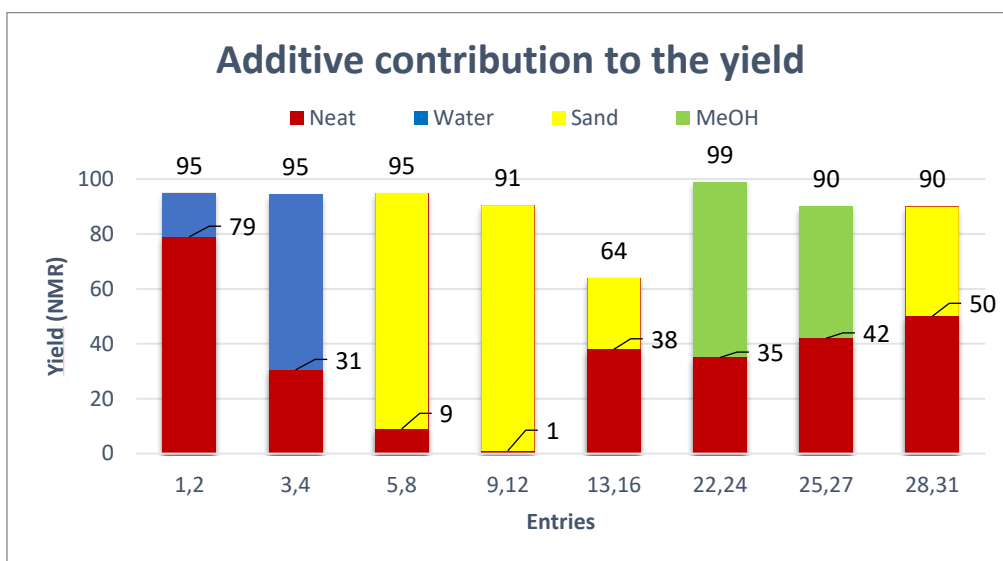

**Scheme S3.** 4-step cascade – yield progression.

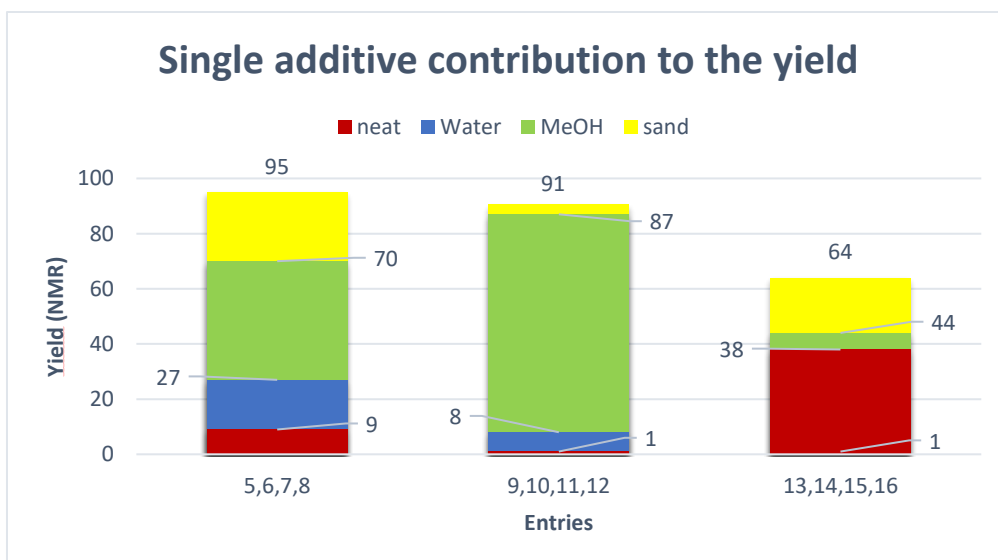

### 1. General information

The mechanochemical reactions were run in 2.0 mL HPLC glass vials with a plastic cap from Fritsch (Ref- 07.5000.00 (Fritsch, supplier)) and milled in a Pulverisette 7 Planetary Micro Mill Premium Line (Ref- 83.3165.00 (Fritsch, supplier)). All reagents were obtained from commercial suppliers and used without further purification. TLC (Thin-Layer Chromatography) analysis was performed using pre-

coated glass plates. Visualization was accomplished by exposure to a UV lamp. High resolution mass spectra were obtained on a Xevo G2-S QToF device from Waters. NMR spectra were recorded with a Bruker Avance III 500 MHz or 600 MHz spectrometer for  $^1\text{H}$ -NMR and  $^{13}\text{C}$ -NMR at 23°C. Chemical shifts ( $\delta$ ) are reported in parts per million (ppm) and referenced to the solvent peaks ( $^1\text{H}$ :  $\delta = 7.26$  ( $\text{CDCl}_3$ ) ppm;  $^{13}\text{C} = 77.16$  ( $\text{CDCl}_3$ )). The following abbreviations are used to report the multiplicity of the peaks: s = singlet, d = doublet, t = triplet, q = quartet, p = pentet, sex. = sextet, sep = septet and combinations thereof, br = broad signal, m = multiplet).

**Figure S1.** Pulverisette 7 premium line (LM<sup>4</sup>).

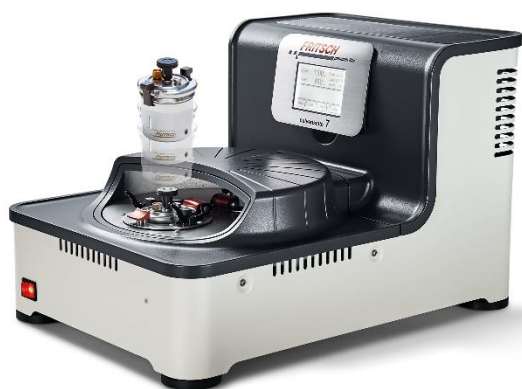

up to twelve reactions in parallel: set up with two 6-position jars hosting 2 ml glass vials (Fritsch supplier, [www.fritsch.de](http://www.fritsch.de))

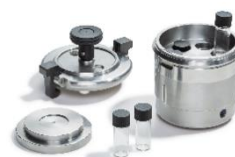

Pulverisette 7 Planetary Micro Mill Premium Line (Ref- 83.3165.00 (Fritsch, supplier)), 6-position bowl and 2.0 mL HPLC glass vials with a plastic cap (Ref- 07.5000.00 (Fritsch, supplier)) – pictures (courtesy from Fritsch.de)

## 2. General procedure

(Het)aryl halide (0.1 mmol), amine (1.2 eq),  $\text{Pd}(\text{OAc})_2$  (CAS-3375-31-3, 6.5 mol%), *t*BuXPhosPdG3 (2-Di-*tert*-butylphosphino-2',4',6'-triisopropyl-1,1'-biphenyl)-2-(2'-amino-1,1'-biphenyl)]palladium(II)-methansulfonate, CAS-1447963-75-8, 6.5 mol%) and *t*-BuOK (CAS-865-47-4, 1.75 eq) were added to 1g Stainless Steel beads (Ref-55.0010.09 (Fritsch, supplier), 1mm diameter, 250 x 4 mg) in the 2.0 mL vial.

For Liquid Assisted Grinding (LAG) conditions 7  $\mu\text{L}$  of the corresponding solvent were added; and for Auxiliary Grinding (inert solid) conditions 100 mg were added. Then the cap was tightly closed under air atmosphere. The mixture was milled for 30min at high frequency (950 - 1100 rpm), at room temperature; it was then dissolved/suspended in  $\text{CHCl}_3$  (3 ml) and filtered through a cotton plug and 30 mg of silicagel. The resulting filtrate was concentrated under a nitrogen flow at room temperature.

For isolated yield determination, the crude was purified using an automated reversed phase flash chromatography on a puriFlash<sup>®</sup> system from Interchim<sup>®</sup> (column: Waters Xselect CSH C18, 150x30 mm, 5  $\mu\text{m}$ ; eluents: (A) water + 0.1% formic acid, (B) MeCN + 0.1% formic acid, (C) MeOH + 0.1% formic acid the ratio is specified later for each compound, flow: 50 mL/min, T = 23 °C) and concentrated under a nitrogen flow at room temperature.

For NMR-yield determination, a definite amount of 1,3,5-trimethoxybenzene (TMB, ca 0.1 mmol) was added to the crude and the mixture was dissolved in  $\text{CDCl}_3$  and analyzed by NMR.

## 3. Characterization of compounds

### 4-Methoxy-*N*-*p*-tolylaniline (1)

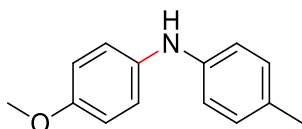

From 4-bromoanisole (CAS-104-92-7) and *p*-toluidine (CAS-106-49-0), LAG conditions (7  $\mu$ l H<sub>2</sub>O) - A gradient of solvent was used for the purification: acetonitrile/water from 61% to 70% over 25 min to yield after evaporation a white solid (18.1 mg, 85%). NMR-yield (n=2, 91/99%).

The spectral data are consistent with those reported in the literature<sup>1</sup>.

<sup>1</sup>H NMR (500 MHz, Chloroform-d)  $\delta$  7.03 (d, *J* = 8.0 Hz, 4H), 6.92 – 6.75 (m, 4H), 3.78 (s, 3H), 2.49 – 2.12 (m, 3H).

<sup>13</sup>C NMR (126 MHz, Chloroform-d)  $\delta$  154.86, 142.46, 136.71, 129.87, 129.37, 121.17, 116.65, 114.74, 55.65, 20.62.

IR (film):  $\nu_{\max}$  3415, 2910, 1611, 1512, 1315, 1294, 1224, 1178, 1106, 1032, 812, 766, 704, 503 cm<sup>-1</sup>.

HR-MS (ESI) *m/z* calcd. for C<sub>14</sub>H<sub>16</sub>NO ([M+H]<sup>+</sup>) 214.1227, found 214.1229.

### 1-Naphthalen-2-yl-piperidine (2)

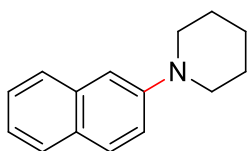

From 2-bromonaphthalene (CAS-580-13-2) and piperidine (CAS-110-89-4), LAG conditions (7  $\mu$ l H<sub>2</sub>O) - A gradient of solvent was used for the purification: MeOH/water from 41% to 50% over 25min. NMR-yield<sup>5</sup> (n=2, 89/100%).

From 2-chloronaphthalene (CAS-91-58-7) and piperidine (CAS-110-89-4), AG conditions (100mg sand) – NMR-yield<sup>5</sup> (n=2, 94/96%).

The spectral data are consistent with those reported in the literature.<sup>2</sup>

<sup>1</sup>H NMR<sup>5</sup> (500 MHz, Chloroform-d)  $\delta$  7.68 (dd, *J* = 13.1, 8.5 Hz, 3H), 7.37 (ddd, *J* = 8.2, 6.6, 1.3 Hz, 1H), 7.31 – 7.22 (m, 2H), 7.12 (d, *J* = 2.4 Hz, 1H), 3.28 – 3.22 (m, 4H), 1.76 (p, *J* = 5.9 Hz, 4H), 1.65 – 1.57 (m, 2H).

<sup>13</sup>C NMR (126 MHz, Chloroform-d)  $\delta$  150.19, 134.84, 128.59, 128.43, 127.49, 126.77, 126.19, 123.19, 120.27, 110.46, 51.11, 26.00, 24.48.

IR (film):  $\nu_{\max}$  2933, 1596, 1380, 1207, 1114, 953, 841, 820, 748, 475 cm<sup>-1</sup>.

HR-MS (ESI) *m/z* calcd. for C<sub>15</sub>H<sub>18</sub>N ([M+H]<sup>+</sup>) 212.1434, found 212.1444.

### *N*,4-dimethyl-*N*-phenylaniline (3)

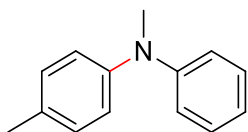

From 4-chlorotoluene (CAS-106-43-4) and *N*-methylaniline (CAS-100-61-8), AG conditions (100 mg sand) - A gradient of solvent was used for the purification: acetonitrile/water from 71% to 80% over 25min. NMR-yield<sup>5</sup> (n=2, 88/93%).

The spectral data are consistent with those reported in the literature<sup>3</sup>.

<sup>1</sup>H NMR<sup>5</sup> (500 MHz, Chloroform-d)  $\delta$  7.27 – 7.19 (m, 2H), 7.14 – 7.08 (m, 2H), 7.02 – 6.96 (m, 2H), 6.95 – 6.89 (m, 2H), 6.89 – 6.83 (m, 1H), 3.28 (s, 3H), 2.32 (s, 3H).

<sup>13</sup>C NMR (126 MHz, Chloroform-d)  $\delta$  149.45, 146.68, 132.09, 129.98, 122.62, 119.87, 118.28, 40.39, 20.81.

IR (film):  $\nu_{\max}$  1594, 1495, 1338, 1130, 748, 693, 511 cm<sup>-1</sup>.

HR-MS (ESI) m/z calcd. for C<sub>14</sub>H<sub>16</sub>N ([M+H]<sup>+</sup>) 198.1277, found 198.1280.

#### *N*-methyl-*N*-phenylpyridin-3-amine (4)

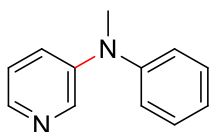

From 3-chloropyridine (CAS-626-60-8) and *N*-methylaniline (CAS-100-61-8), AG conditions (100 mg sand) - A gradient of solvent was used for the purification: acetonitrile/water from 11% to 20% over 25min. NMR-yield<sup>5</sup> (n=2, 60/68%).

The spectral data are consistent with those reported in the literature.<sup>3</sup>

<sup>1</sup>H NMR<sup>5</sup> (500 MHz, Chloroform-d)  $\delta$  8.31 (s, 1H), 8.16 – 8.11 (m, 1H), 7.37 – 7.29 (m, 2H), 7.28 – 7.19 (m, 1H), 7.14 (dd, *J* = 8.4, 4.6 Hz, 1H), 7.13 – 7.04 (m, 3H), 3.34 (s, 3H).

<sup>13</sup>C NMR (126 MHz, Chloroform-d)  $\delta$  147.92, 145.12, 141.18, 140.62, 129.62, 124.78, 123.45, 123.28, 122.41, 40.04.

IR (film):  $\nu_{\max}$  1577, 1483, 1420, 1341, 1245, 753, 696 cm<sup>-1</sup>.

HR-MS (ESI) m/z calcd. for C<sub>12</sub>H<sub>13</sub>N<sub>2</sub> ([M+H]<sup>+</sup>) 185.1073, found 185.1080.

#### *N*-methyl-*N*-phenylthiophen-2-amine (5)

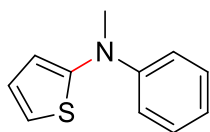

From 2-chlorothiophene (CAS-96-43-5) and *N*-methylaniline (CAS-100-61-8), neat conditions - After filtration and evaporation, NMR-yield<sup>5</sup> (n=2, 75/76%).

<sup>1</sup>H NMR<sup>5,6</sup> (500 MHz, Chloroform-d)  $\delta$  7.27 – 7.21 (m, 2H), 6.99 – 6.91 (m, 3H), 6.91 – 6.84 (m, 2H), 6.64 (dd, *J* = 3.7, 1.4 Hz, 1H), 3.32 (s, 3H).

IR (film):  $\nu_{\max}$  2928, 1650, 1595, 1493, 1384, 1114, 751, 695 cm<sup>-1</sup>.

HR-MS (ESI) m/z calcd. for C<sub>11</sub>H<sub>12</sub>NS ([M+H]<sup>+</sup>) 190.0685, found 190.0685

#### *N*-methyl-*N*-phenylbiphenyl-4-amine (6)

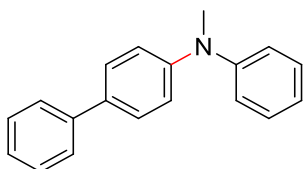

From 4-chlorobiphenyl (CAS-2051-62-9) and *N*-methylaniline (CAS-100-61-8), neat conditions - A gradient of solvent was used for the purification: acetonitrile/water from 81% to 90% over 25 min to yield after evaporation a white solid (n=2, 20.4/19.1 mg, 74/79%). NMR-yield (n=2, 91/93%).

The spectral data are consistent with those reported in the literature<sup>3</sup>.

<sup>1</sup>H NMR (500 MHz, Chloroform-d)  $\delta$  7.59 – 7.53 (m, 2H), 7.53 – 7.47 (m, 2H), 7.44 – 7.37 (m, 2H), 7.34 – 7.25 (m, 3H), 7.13 – 7.08 (m, 2H), 7.08 – 7.02 (m, 2H), 7.00 (tt,  $J$  = 7.3, 1.2 Hz, 1H), 3.35 (s, 3H).

<sup>13</sup>C NMR (126 MHz, Chloroform-d)  $\delta$  148.94, 148.48, 141.03, 133.60, 129.45, 128.85, 127.90, 126.72, 126.69, 122.12, 121.62, 119.78, 40.41.

IR (film):  $\nu_{\text{max}}$  1587, 1487, 1340, 1255, 756, 690, 499  $\text{cm}^{-1}$ .

HR-MS (ESI)  $m/z$  calcd. for  $\text{C}_{19}\text{H}_{18}\text{N}$  ( $[\text{M}+\text{H}]^+$ ) 260.1434, found 260.1443.

#### *N*-phenylbiphenyl-4-amine (7)

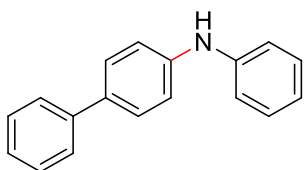

From 4-chlorobiphenyl (CAS-2051-62-9) and aniline (CAS-62-53-3), LAG conditions (7  $\mu\text{l}$  MeOH) - A gradient of solvent was used for the purification: acetonitrile/water from 71% to 80% over 25 min to yield after evaporation a white solid (22.1 mg, 90%). NMR-yield (n=2, 98/100%).

The spectral data are consistent with those reported in the literature.<sup>3</sup>

<sup>1</sup>H NMR (500 MHz, Chloroform-d)  $\delta$  7.59 (d,  $J$  = 7.5 Hz, 2H), 7.53 (d,  $J$  = 8.6 Hz, 2H), 7.44 (t,  $J$  = 7.6 Hz, 2H), 7.36 – 7.27 (m, 3H), 7.14 (t,  $J$  = 8.9 Hz, 4H), 6.97 (t,  $J$  = 7.3 Hz, 1H), 5.92 – 5.65 (m, 1H).

<sup>13</sup>C NMR (126 MHz, Chloroform-d)  $\delta$  142.94, 142.64, 140.93, 133.79, 129.49, 128.84, 128.05, 126.69, 126.62, 121.32, 118.19, 117.89.

IR (film):  $\nu_{\text{max}}$  3370, 1595, 1504, 1321, 846, 745, 692, 493  $\text{cm}^{-1}$ .

HR-MS (ESI)  $m/z$  calcd. for  $\text{C}_{18}\text{H}_{16}\text{N}$  ( $[\text{M}+\text{H}]^+$ ) 246.1277, found 246.1284.

#### 4-methoxy-*N*-phenylaniline (8)

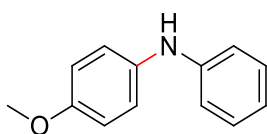

From 4-chloroanisole (CAS-623-12-1) and aniline (CAS-62-53-3), LAG conditions (7  $\mu$ l MeOH) - A gradient of solvent was used for the purification: acetonitrile/water from 51% to 60% over 25 min to yield after evaporation a white solid (15.8 mg, 79%). NMR-yield (n=2, 85/95%).

The spectral data are consistent with those reported in the literature.<sup>3</sup>

**<sup>1</sup>H NMR** (500 MHz, Chloroform-d)  $\delta$  7.20 (dd,  $J$  = 8.6, 7.3 Hz, 2H), 7.07 (d,  $J$  = 8.9 Hz, 2H), 6.90 (dd,  $J$  = 8.6, 1.1 Hz, 2H), 6.88 – 6.79 (m, 3H), 3.79 (s, 3H).

**<sup>13</sup>C NMR** (126 MHz, Chloroform-d)  $\delta$  155.44, 145.28, 135.85, 129.44, 122.35, 119.74, 115.82, 114.81, 55.71.

**IR (film):**  $\nu_{\text{max}}$  3362, 1596, 1491, 1229, 1027, 743, 690, 500  $\text{cm}^{-1}$ .

**HR-MS (ESI)**  $m/z$  calcd. for  $\text{C}_{13}\text{H}_{14}\text{NO}$  ( $[\text{M}+\text{H}]^+$ ) 200.1070, found 200.1075.

#### 8-chloro-*N*-*p*-tolylquinolin-2-amine (9)

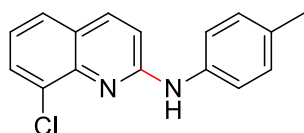

From 2,8-dichloroquinoline (CAS-4470-83-1) and *p*-toluidine (CAS-106-49-0), AG conditions (100 mg sand) - A gradient of solvent was used for the purification: acetonitrile/water from 61% to 70% over 25 min to yield after evaporation a yellow solid (15.5 mg, 58%). NMR-yield (n=2, 84/96%).

The spectral data are consistent with those reported in the literature.<sup>3</sup>

**<sup>1</sup>H NMR** <sup>1</sup>H NMR (500 MHz, Chloroform-d)  $\delta$  7.86 (d,  $J$  = 8.9 Hz, 1H), 7.69 (dd,  $J$  = 7.6, 1.4 Hz, 1H), 7.59 – 7.53 (m, 2H), 7.52 (dd,  $J$  = 8.1, 1.4 Hz, 1H), 7.21 – 7.14 (m, 3H), 6.94 (d,  $J$  = 9.0 Hz, 1H), 2.35 (s, 3H).

**<sup>13</sup>C NMR** (126 MHz, Chloroform-d)  $\delta$  155.01, 138.11, 137.26, 133.30, 130.01, 129.97, 126.52, 125.21, 122.81, 121.01, 112.44, 21.01.

**IR (film):**  $\nu_{\text{max}}$  3400, 1604, 1519, 1420, 1334, 816, 744, 662, 533, 511  $\text{cm}^{-1}$ .

**HR-MS (ESI)**  $m/z$  calcd. for  $\text{C}_{16}\text{H}_{14}\text{ClN}_2$  ( $[\text{M}+\text{H}]^+$ ) 269.0840, found 269.0843

#### 2-morpholinobenzo[d]oxazole (10)

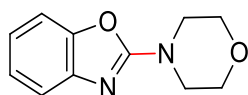

From 2-chlorobenzoxazole (CAS-615-18-9) and morpholine (CAS-110-91-8), neat conditions - A gradient of solvent was used for the purification: acetonitrile/water from 31% to 40% over 25 min to yield after evaporation a beige solid (12.1 mg, 59%). NMR-yield (n=2, 58/60%).

The spectral data are consistent with those reported in the literature.<sup>4</sup>

**<sup>1</sup>H NMR** (500 MHz, Chloroform-d)  $\delta$  7.38 (dd,  $J$  = 7.8, 1.2 Hz, 1H), 7.29 – 7.24 (m, 1H), 7.18 (td,  $J$  = 7.7, 1.1 Hz, 1H), 7.04 (td,  $J$  = 7.8, 1.2 Hz, 1H), 3.85 – 3.79 (m, 4H), 3.69 (dd,  $J$  = 5.8, 4.0 Hz, 4H).



**<sup>13</sup>C NMR** (126 MHz, Chloroform-d)  $\delta$  162.09, 148.76, 142.87, 124.09, 120.93, 116.50, 108.83, 66.18, 45.73.

**IR (film):**  $\nu_{\text{max}}$  1653, 1576, 1457, 1288, 1240, 1108, 797, 742  $\text{cm}^{-1}$ .

**HR-MS (ESI)**  $m/z$  calcd. for  $\text{C}_{11}\text{H}_{13}\text{N}_2\text{O}_2$  ( $[\text{M}+\text{H}]^+$ ) 205.0972, found 205.0977.

*4-(4-(pyridin-2-ylmethyl)phenyl)morpholine (11)*

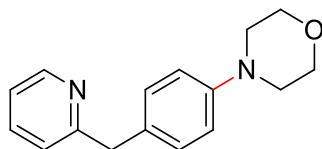

From 2-(4-chlorobenzyl)pyridine (CAS-4350-41-8) and morpholine (CAS-110-91-8), neat conditions - A gradient of solvent was used for the purification: acetonitrile/water from 11% to 20% over 25 min to yield after evaporation a yellow oil (17.3 mg, 63%). NMR-yield (n=2, 83/92%).

The spectral data are consistent with those reported in the literature.<sup>4</sup>

**<sup>1</sup>H NMR** (500 MHz, Chloroform-d)  $\delta$  8.54 (d,  $J = 4.9$  Hz, 1H), 7.56 (td,  $J = 7.7, 1.9$  Hz, 1H), 7.17 (d,  $J = 8.2$  Hz, 2H), 7.09 (dd,  $J = 7.5, 3.3$  Hz, 2H), 6.86 (d,  $J = 8.3$  Hz, 2H), 4.08 (s, 2H), 3.91 – 3.78 (m, 4H), 3.20 – 3.04 (m, 4H).

**<sup>13</sup>C NMR** (126 MHz, Chloroform-d)  $\delta$  161.59, 149.97, 149.33, 136.64, 131.13, 129.96, 123.15, 121.27, 116.10, 67.07, 49.64, 43.92.

**IR (film):**  $\nu_{\text{max}}$  1513, 1233, 1118, 925, 804, 749, 597  $\text{cm}^{-1}$ .

**HR-MS (ESI)**  $m/z$  calcd. for  $\text{C}_{16}\text{H}_{19}\text{N}_2\text{O}$  ( $[\text{M}+\text{H}]^+$ ) 255.1492, found 255.1494.

*4-(p-tolyl)morpholine (12)*

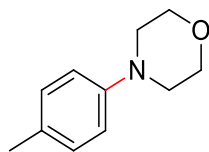

From 4-bromotoluene (CAS-106-38-7) and morpholine (CAS-110-91-8), neat conditions - A gradient of solvent was used for the purification: acetonitrile/water from 31% to 40% over 25min to yield after evaporation a yellow solid (16.5 mg, 93%). NMR-yield (n=2, 91/95%).

The spectral data are consistent with those reported in the literature.<sup>4</sup>

**<sup>1</sup>H NMR** (500 MHz, Chloroform-d)  $\delta$  7.12 – 7.06 (m, 2H), 6.87 – 6.80 (m, 2H), 3.88 – 3.83 (m, 4H), 3.13 – 3.08 (m, 4H), 2.27 (s, 3H).

**<sup>13</sup>C NMR** (126 MHz, Chloroform-d)  $\delta$  149.31, 129.83, 116.19, 67.11, 50.10, 20.55.

**IR (film):**  $\nu_{\text{max}}$  1510, 1451, 1226, 1115, 1047, 921, 818, 607  $\text{cm}^{-1}$ .

**HR-MS (ESI)**  $m/z$  calcd. for  $\text{C}_{11}\text{H}_{16}\text{NO}$  ( $[\text{M}+\text{H}]^+$ ) 178.1227, found 178.1232.

#### 4-(4-fluorophenyl)morpholine (**13**)

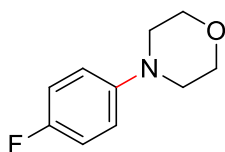

From 4-bromofluorobenzene (CAS-460-00-4) and morpholine (CAS-110-91-8), neat conditions - A gradient of solvent was used for the purification: acetonitrile/water from 31% to 40% over 25 min to yield after evaporation a yellow solid (13.4 mg, 74%). NMR-yield (n=2, 89/89%).

The spectral data are consistent with those reported in the literature.<sup>4</sup>

<sup>1</sup>H NMR (500 MHz, Chloroform-d)  $\delta$  6.98 (dd,  $J = 9.2, 8.2$  Hz, 2H), 6.90 – 6.84 (m, 2H), 3.89 – 3.83 (m, 4H), 3.11 – 3.05 (m, 4H).

<sup>19</sup>F NMR (471 MHz, Chloroform-d)  $\delta$  -123.98 – -124.52 (m).

<sup>13</sup>C NMR (126 MHz, Chloroform-d)  $\delta$  157.39 ( $J = 238.9$  Hz), 148.01 ( $J = 2.7$  Hz), 117.55 ( $J = 7.6$  Hz), 115.68 ( $J = 21.98$  Hz), 66.98, 50.40.

IR (film):  $\nu_{\text{max}}$  1505, 1221, 1116, 920, 842, 814, 707, 536  $\text{cm}^{-1}$ .

HR-MS (ESI)  $m/z$  calcd. for  $\text{C}_{10}\text{H}_{13}\text{FNO}$  ( $[\text{M}+\text{H}]^+$ ) 182.0976, found 182.0982.

#### 4-morpholinobenzonitrile (**14**)

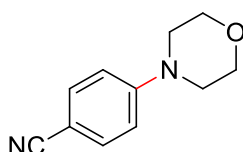

From 4-chlorobenzonitrile (CAS-623-03-0) and morpholine (CAS-110-91-8), neat conditions - A gradient of solvent was used for the purification: acetonitrile/water from 31% to 40% over 25 min to yield after evaporation a white solid (7.6 mg, 40%). NMR-yield (n=2, 49/55%).

The spectral data are consistent with those reported in the literature.<sup>4</sup>

<sup>1</sup>H NMR (500 MHz, Chloroform-d)  $\delta$  7.55 – 7.49 (m, 2H), 6.89 – 6.83 (m, 2H), 3.88 – 3.82 (m, 4H), 3.31 – 3.25 (m, 4H).

<sup>13</sup>C NMR (126 MHz, Chloroform-d)  $\delta$  153.62, 133.65, 119.97, 114.22, 101.15, 66.58, 47.46.

IR (film):  $\nu_{\text{max}}$  2215, 1603, 1515, 1243, 1179, 1112, 926, 833, 545  $\text{cm}^{-1}$ .

HR-MS (ESI)  $m/z$  calcd. for  $\text{C}_{11}\text{H}_{13}\text{N}_2\text{O}$  ( $[\text{M}+\text{H}]^+$ ) 189.1022, found 189.1027.

#### References

- (1) P. Klumphu and B. H. Lipshutz, *J. Org. Chem.* 2014, **79**, 3, 888.
- (2) T. Jin, F. Yang and Y. Yamamoto, *Org. Lett.* 2010, **12**, 388.
- (3) Q.-L. Shao, Z.-J. Jiang and W.-K. Su, *Tetrahedron Letters* 2018, **59**, 2277.
- (4) Q. Cao, W. Nicholson, A. Jones and D. L. Browne, *Org. Biomol. Chem.* 2019, **17**, 1722.

- (5) an isolated yield could not be determined with accuracy because of high volatility of the product (s. also ref. 13 of the manuscript); NMR might contain residual solvents or impurities and NMR-yield is mentioned as surrogate.
- (6) D.-H. Li, X.-B. Lan, A.-X. Song, M. Rahman, C. Xu, F.-D. Huang, R. Szostak, M. Szostak, F.-S. Liu, *Chem. Eur. J.* 2022, **28**, e2021033: “our” compound **5** is compound **3i** in the publication:  $^1\text{H}$  NMR (400 MHz, Chloroform-d)  $\delta$  7.27 – 7.21 (m, 2H), 6.94 (ddd,  $J$  = 3.7, 1.8, 0.8 Hz, 3H), 6.90 – 6.85 (m, 2H), 6.64 (dd,  $J$  = 3.6, 1.4 Hz, 1H), 3.32 (s, 3H);  $^{13}\text{C}$  NMR (101 MHz, Chloroform-d)  $\delta$  153.6, 149.2, 128.9, 125.7, 119.9, 119.5, 118.7, 116.2, 42.0. Because of the low amount isolated<sup>5</sup> and the subsequent low signal to noise ratio we cannot report own  $^{13}\text{C}$ -NMR data.

#### 4. Copies of $^1\text{H}$ and $^{13}\text{C}$ NMR spectra

##### $^1\text{H}$ NMR and $^{13}\text{C}$ NMR 4-Methoxy-N-p-tolylaniline (**1**)

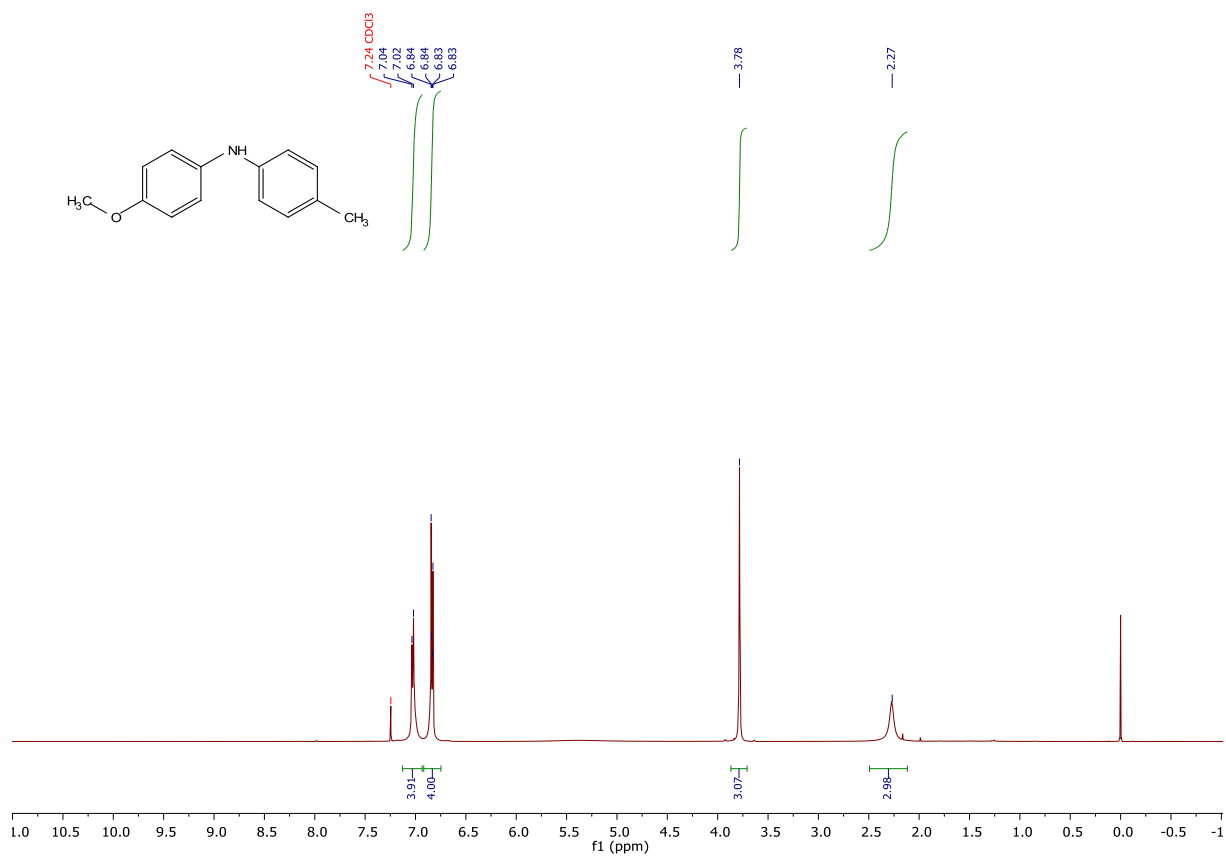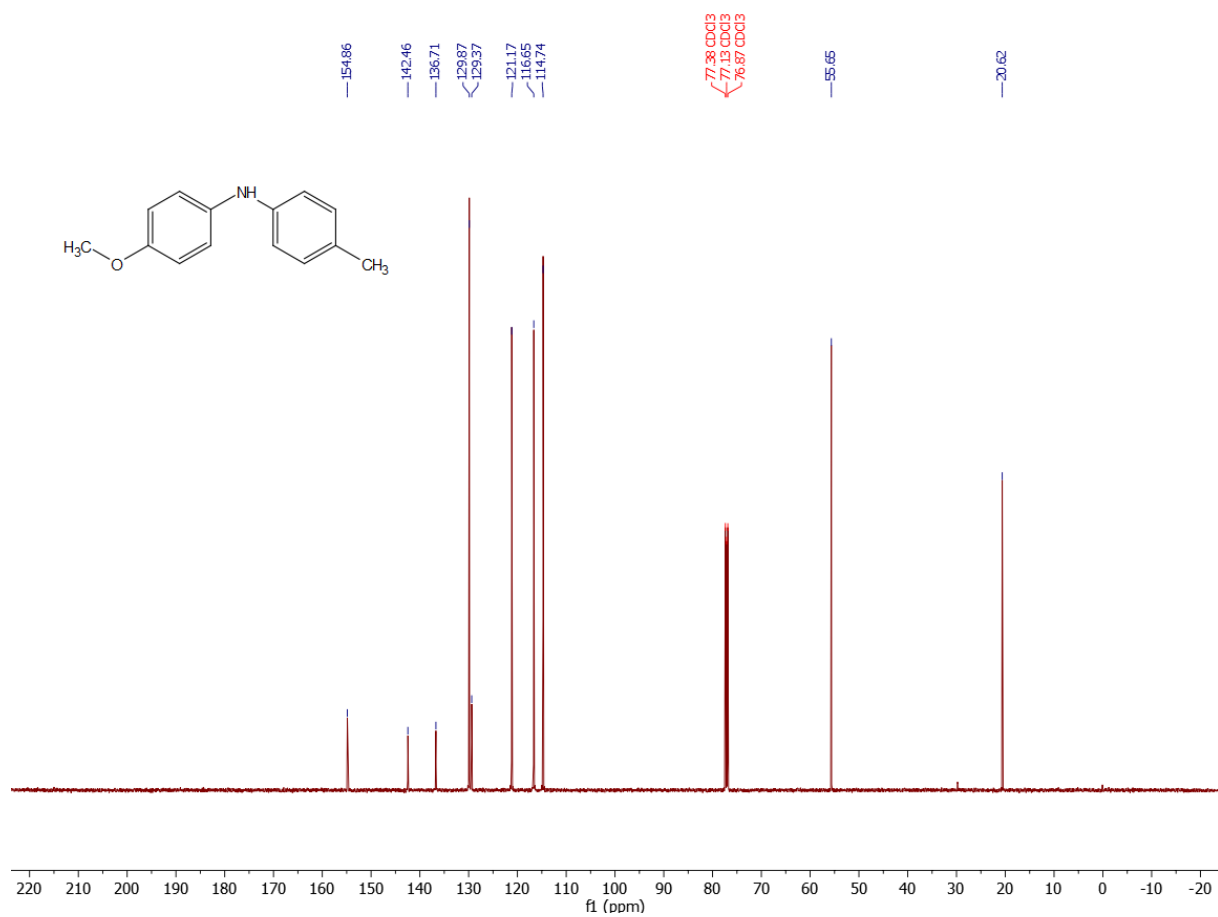

<sup>1</sup>H NMR and <sup>13</sup>C NMR 1-Naphthalen-2-yl-piperidine (**2**)<sup>5</sup>

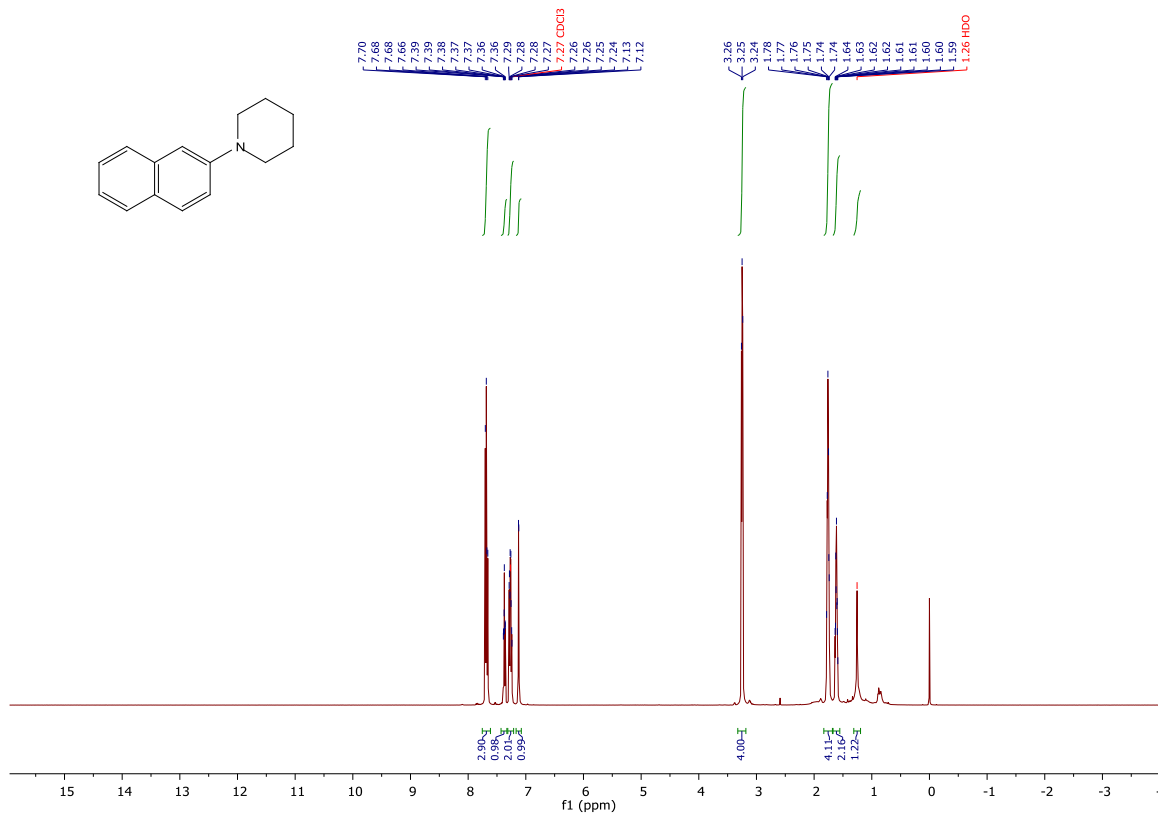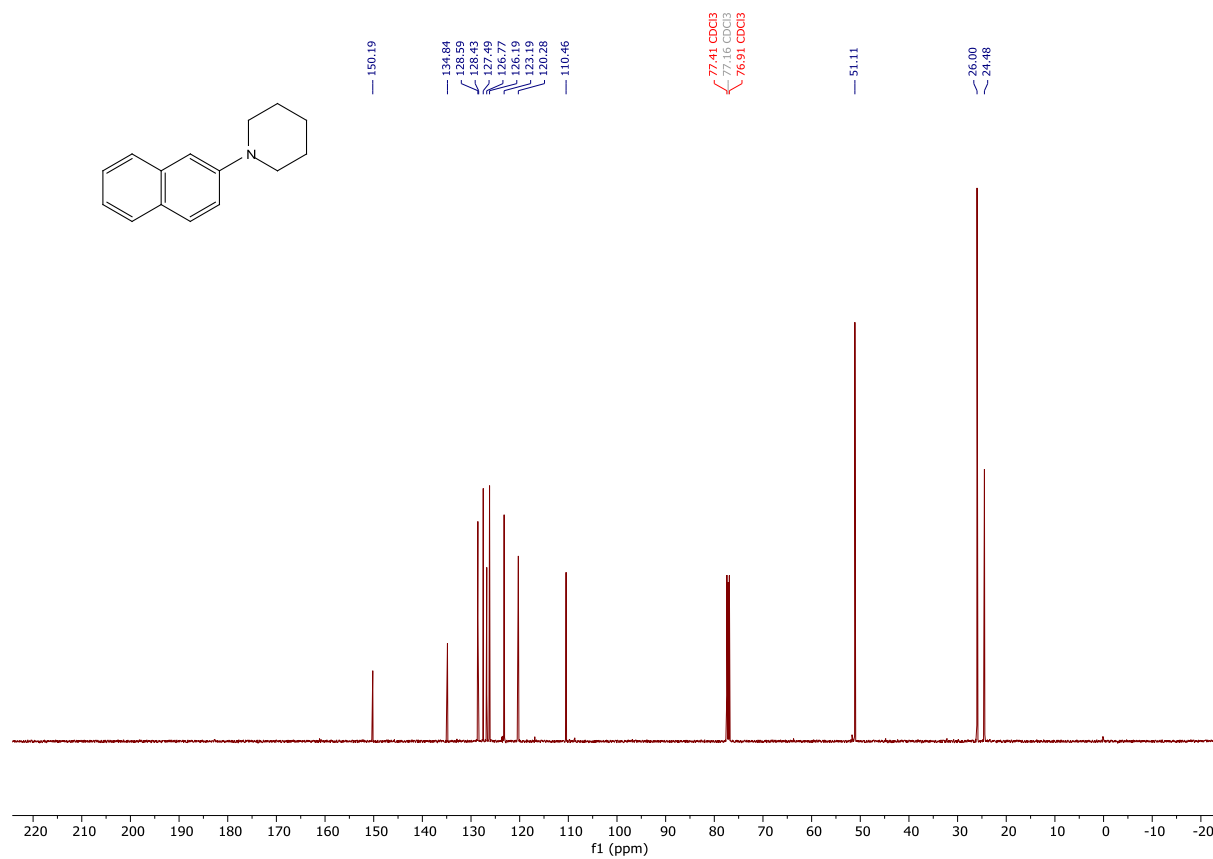

$^1\text{H}$  NMR and  $^{13}\text{C}$  NMR *N*,4-dimethyl-*N*-phenylaniline (**3**)<sup>5</sup>

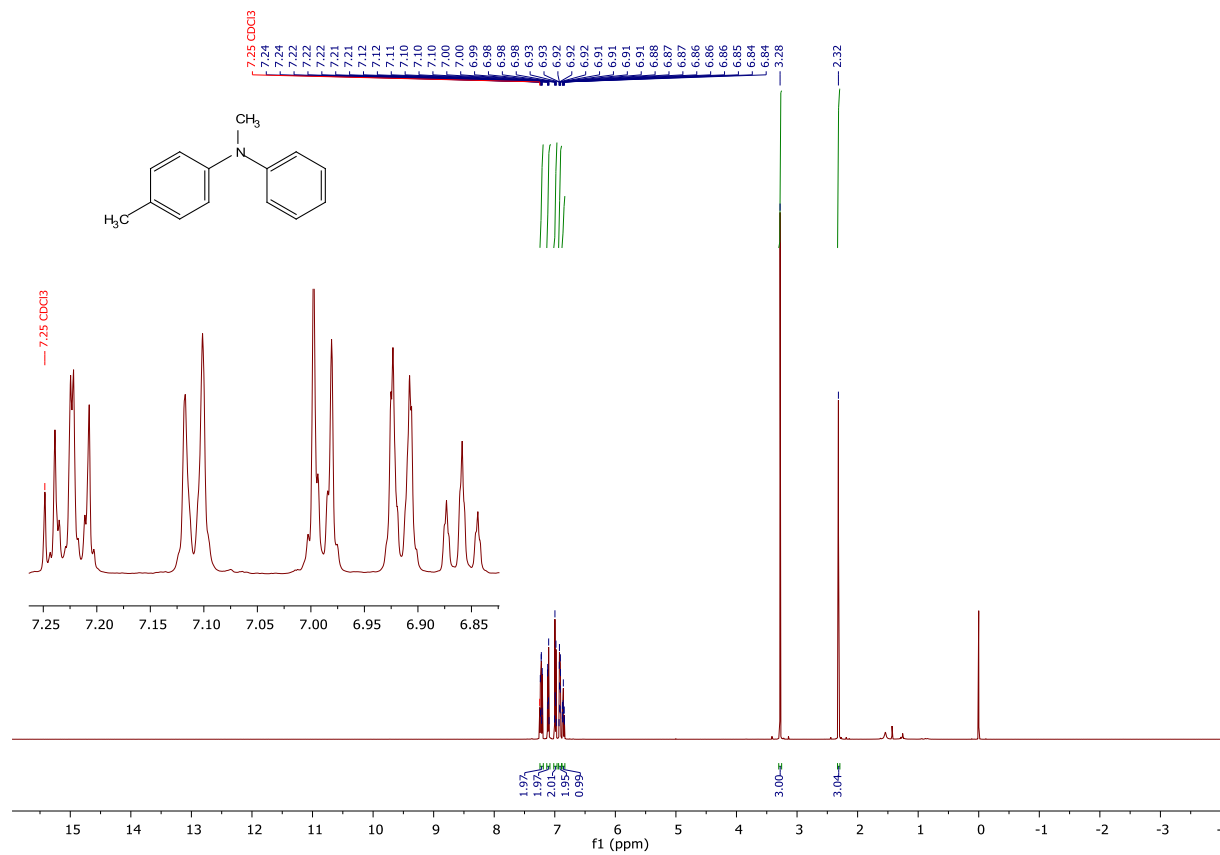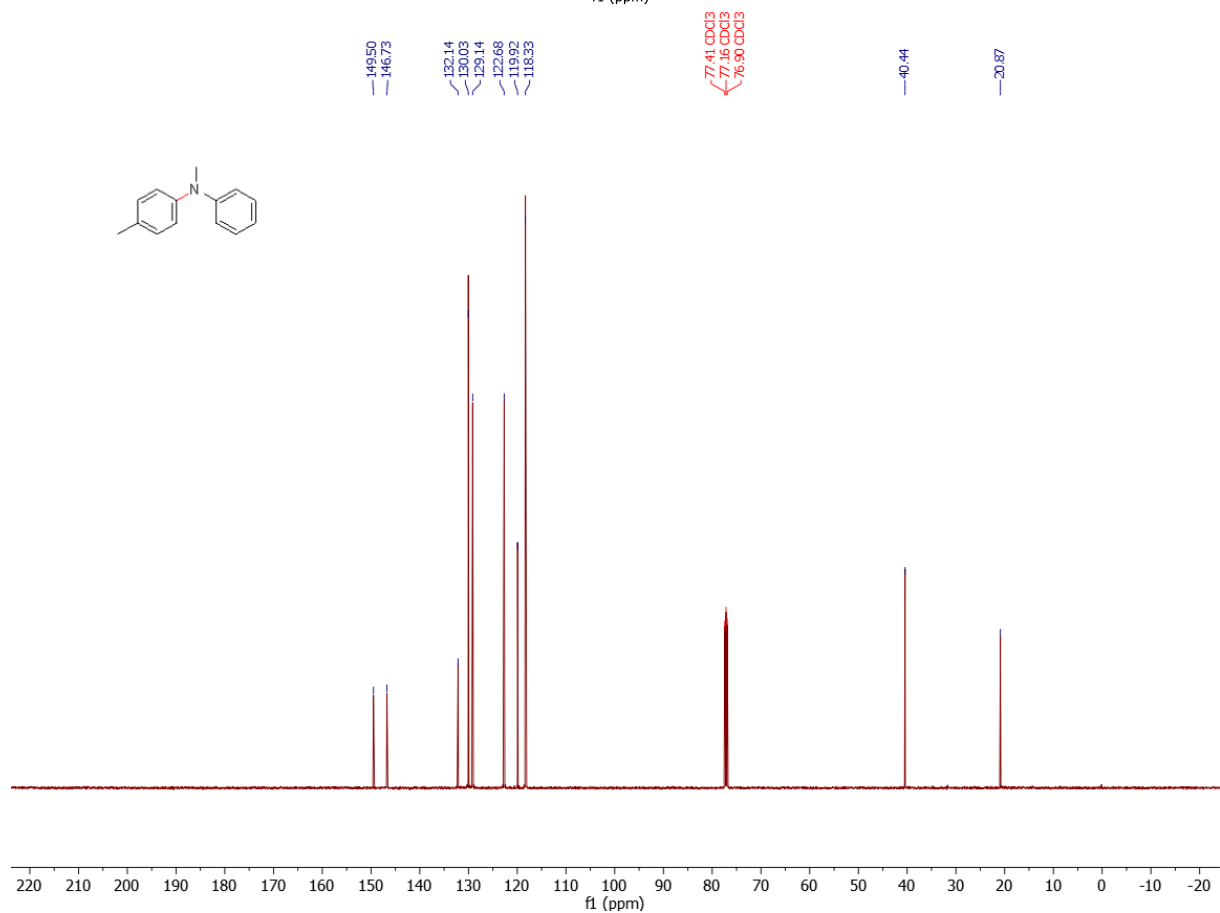

<sup>1</sup>H NMR and <sup>13</sup>C NMR *N*-methyl-*N*-phenylpyridin-3-amine (**4**)<sup>5</sup>

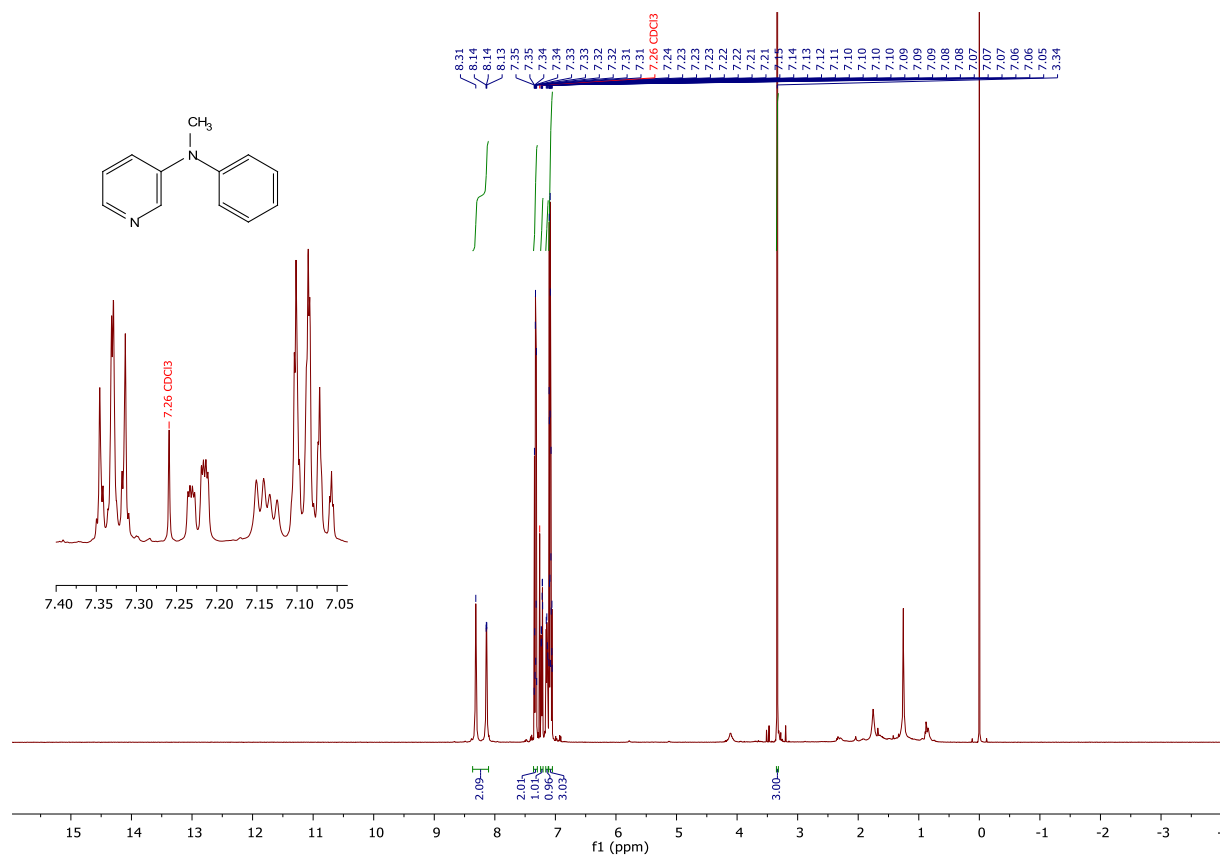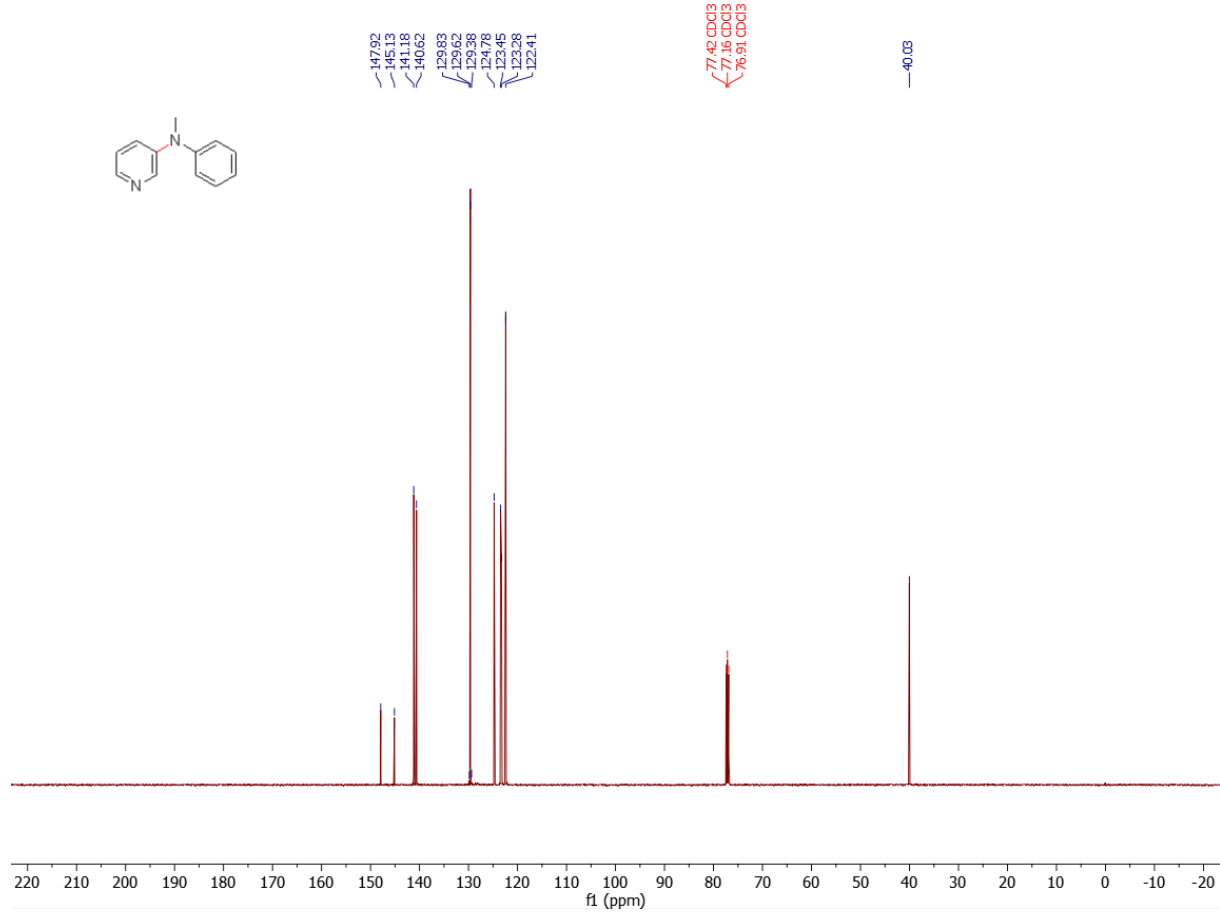

<sup>1</sup>H NMR *N*-methyl-*N*-phenylthiophen-2-amine (**5**)<sup>5,6</sup>

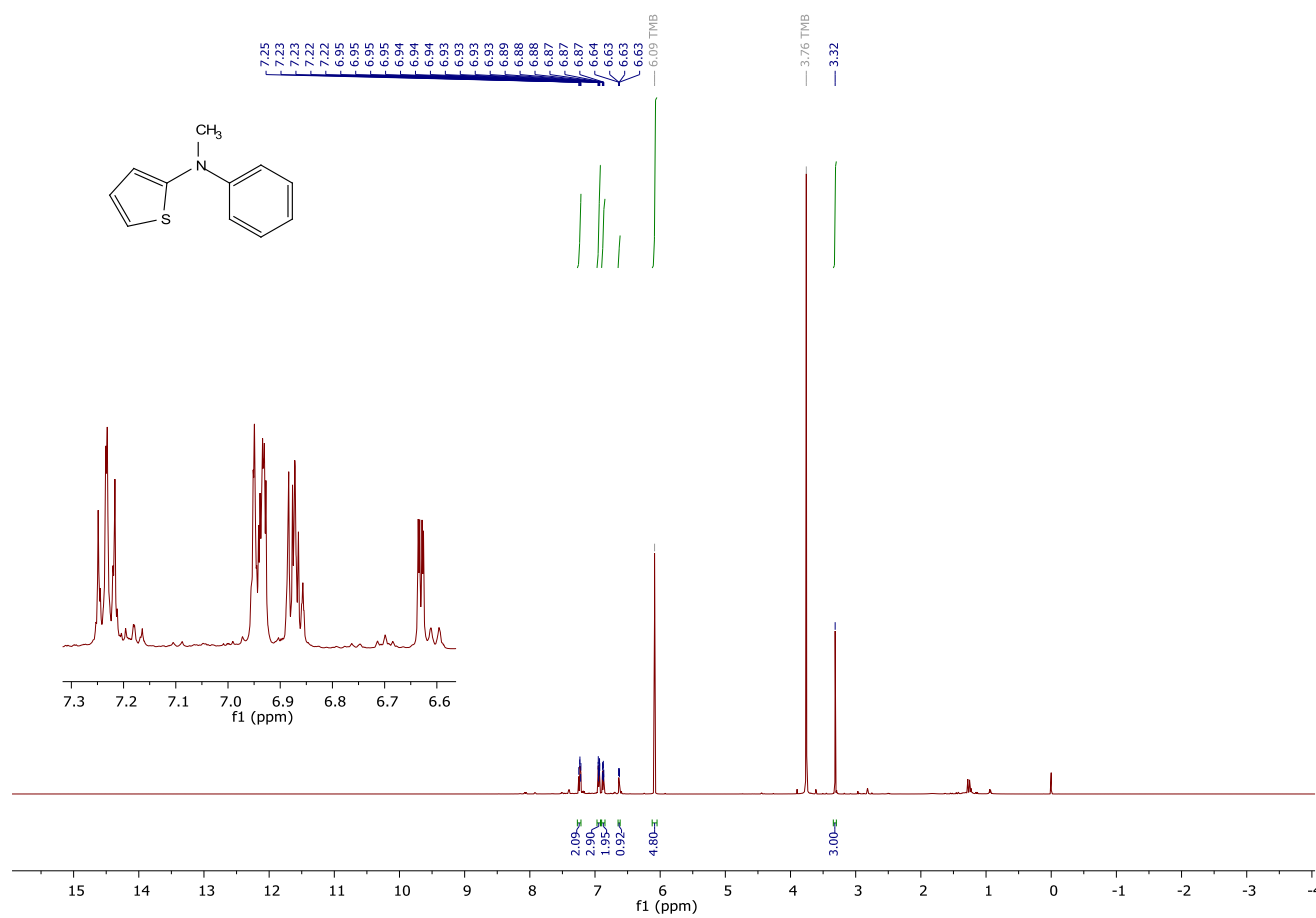



**<sup>1</sup>H NMR and <sup>13</sup>C NMR *N*-methyl-*N*-phenylbiphenyl-4-amine (6)**

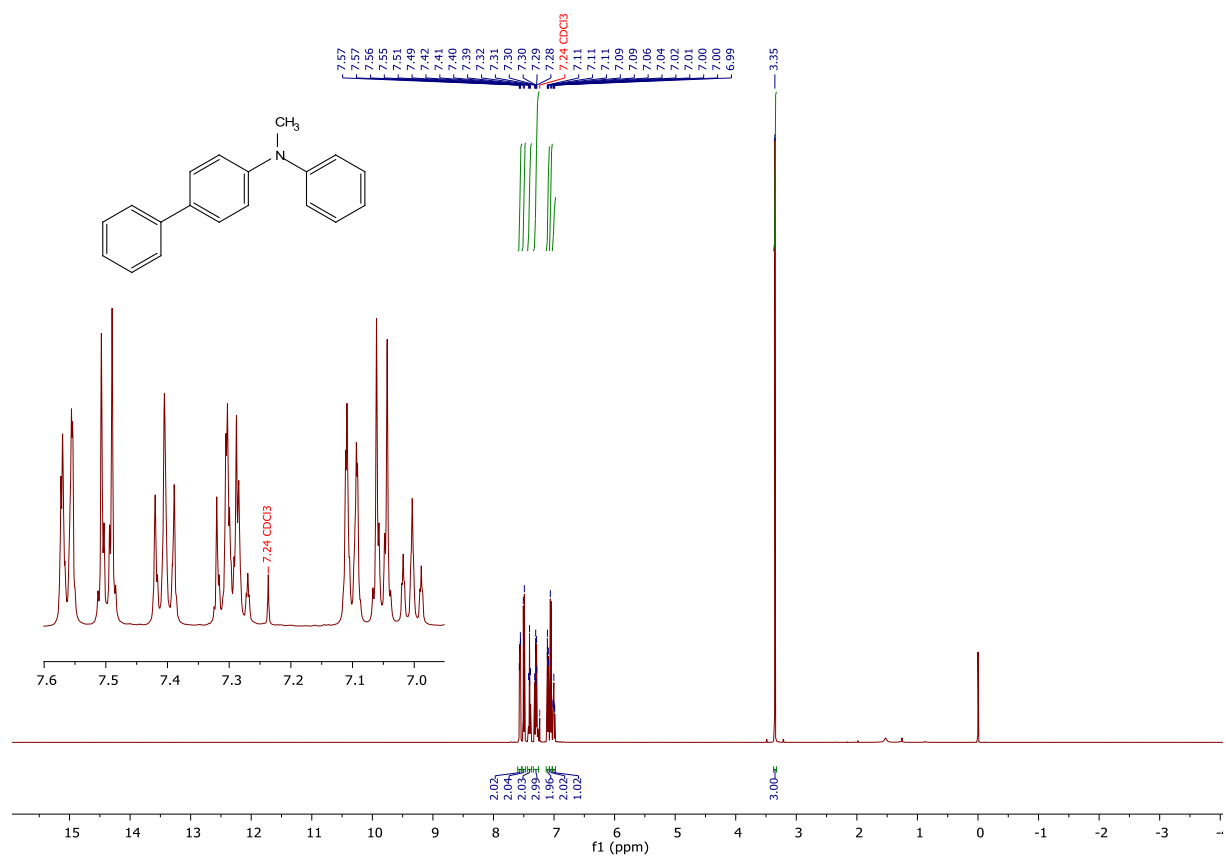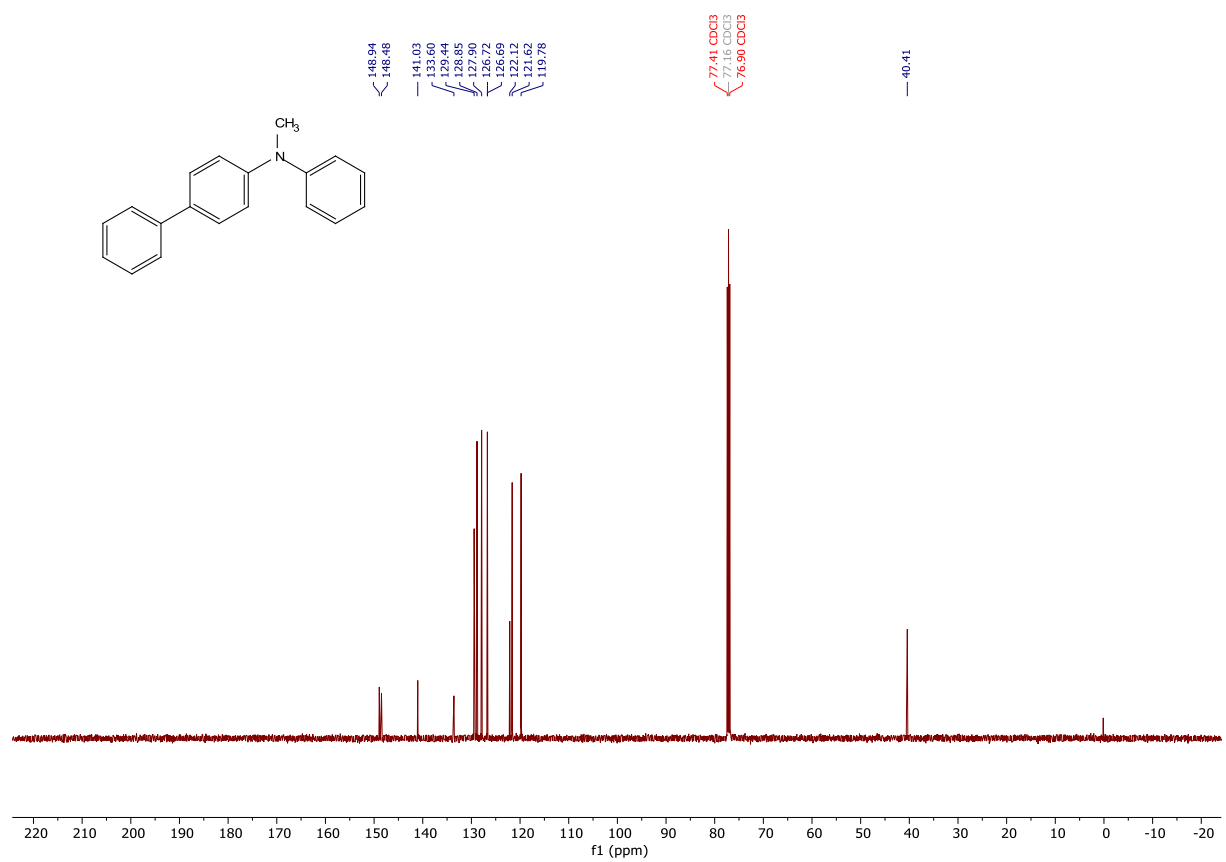

<sup>1</sup>H NMR and <sup>13</sup>C NMR *N*-phenylbiphenyl-4-amine (7)

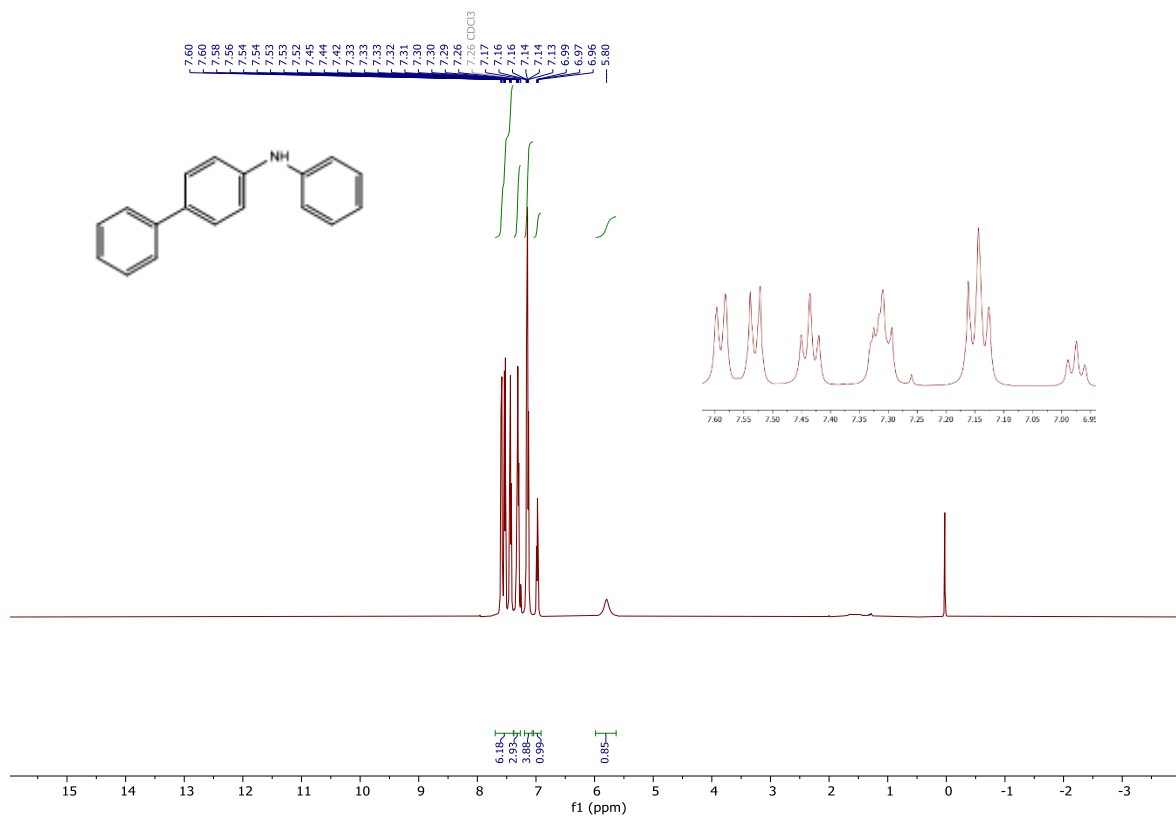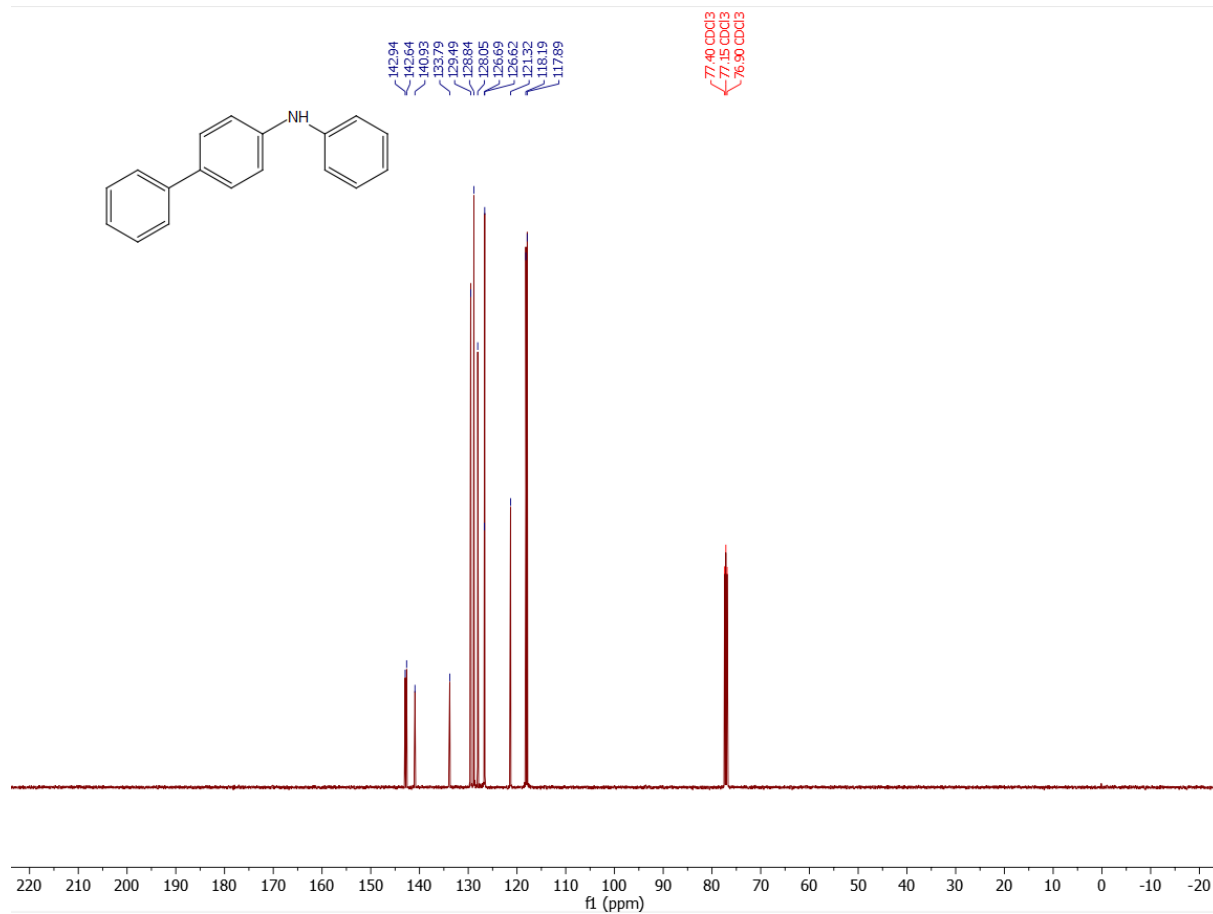

<sup>1</sup>H NMR and <sup>13</sup>C NMR 4-methoxy-N-phenylaniline (**8**)

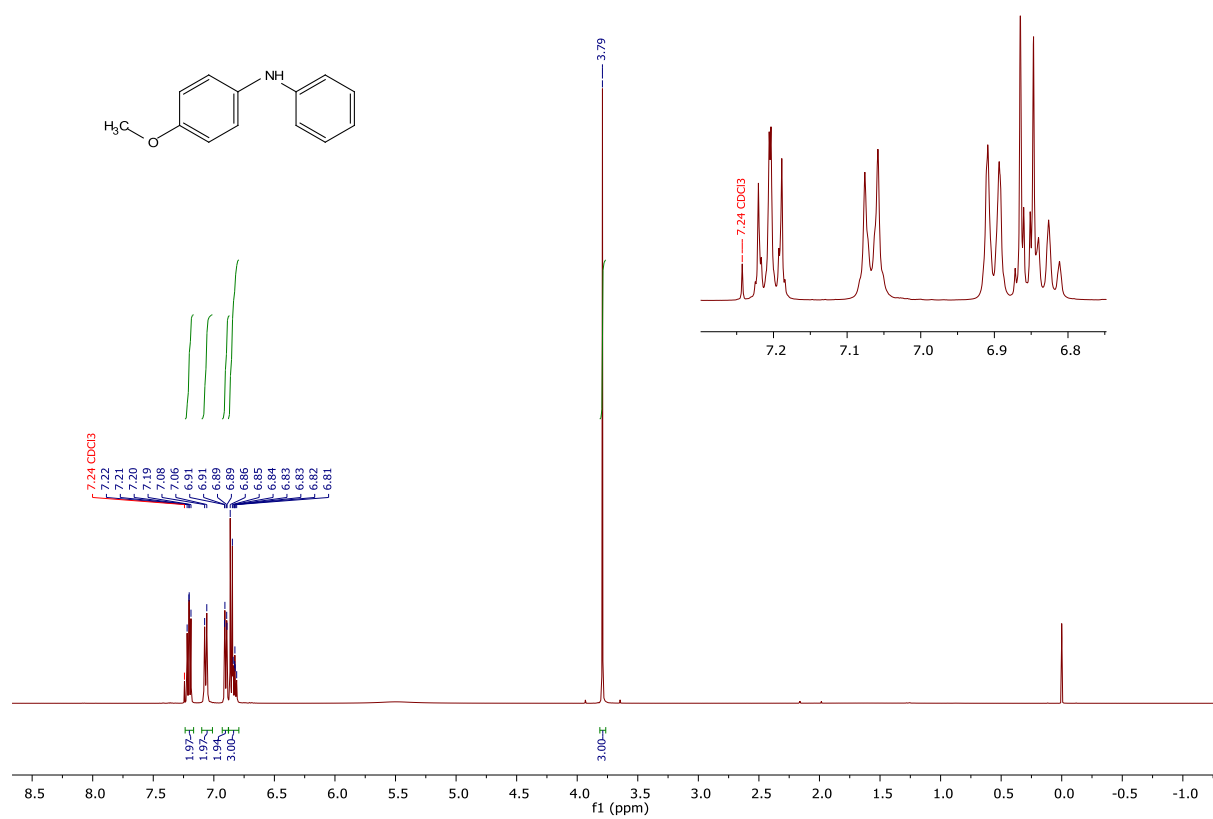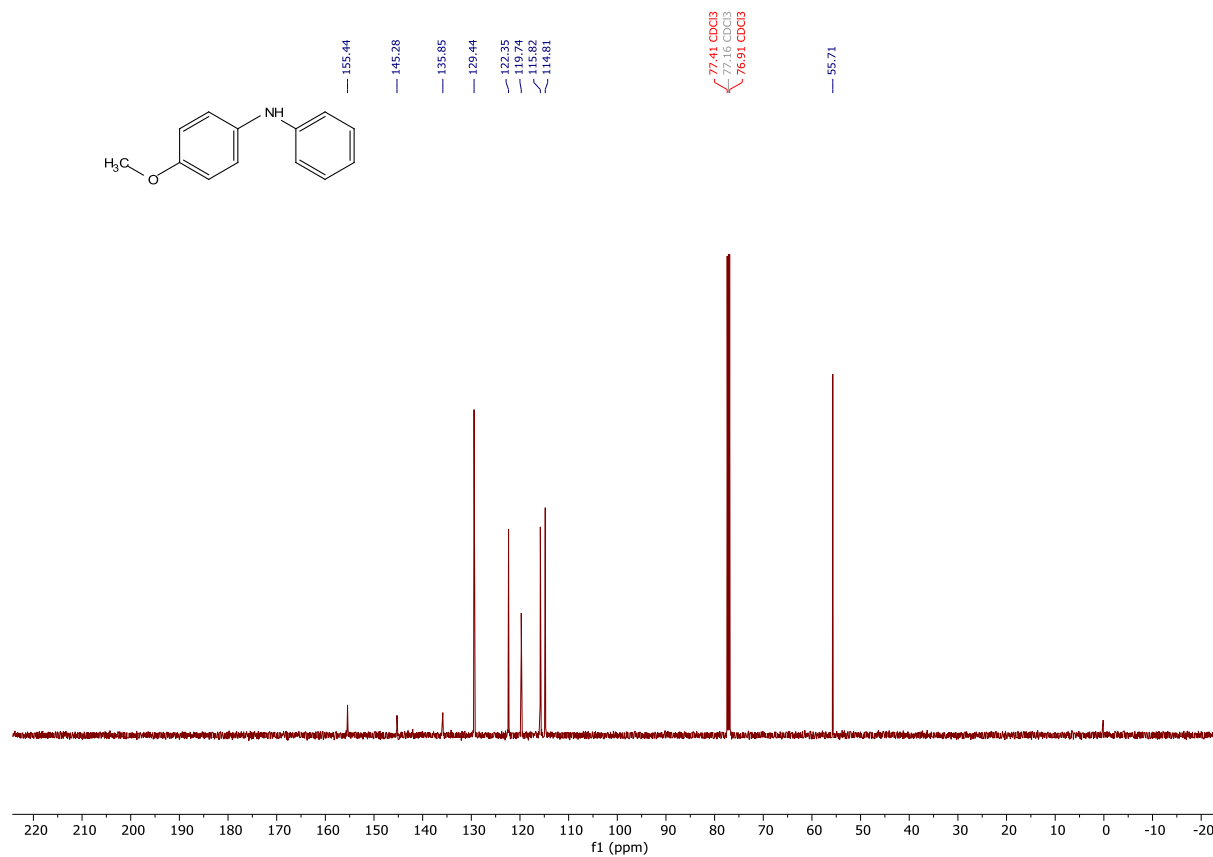

$^1\text{H}$  NMR and  $^{13}\text{C}$  NMR 8-chloro-N-p-tolylquinolin-2-amine (9)

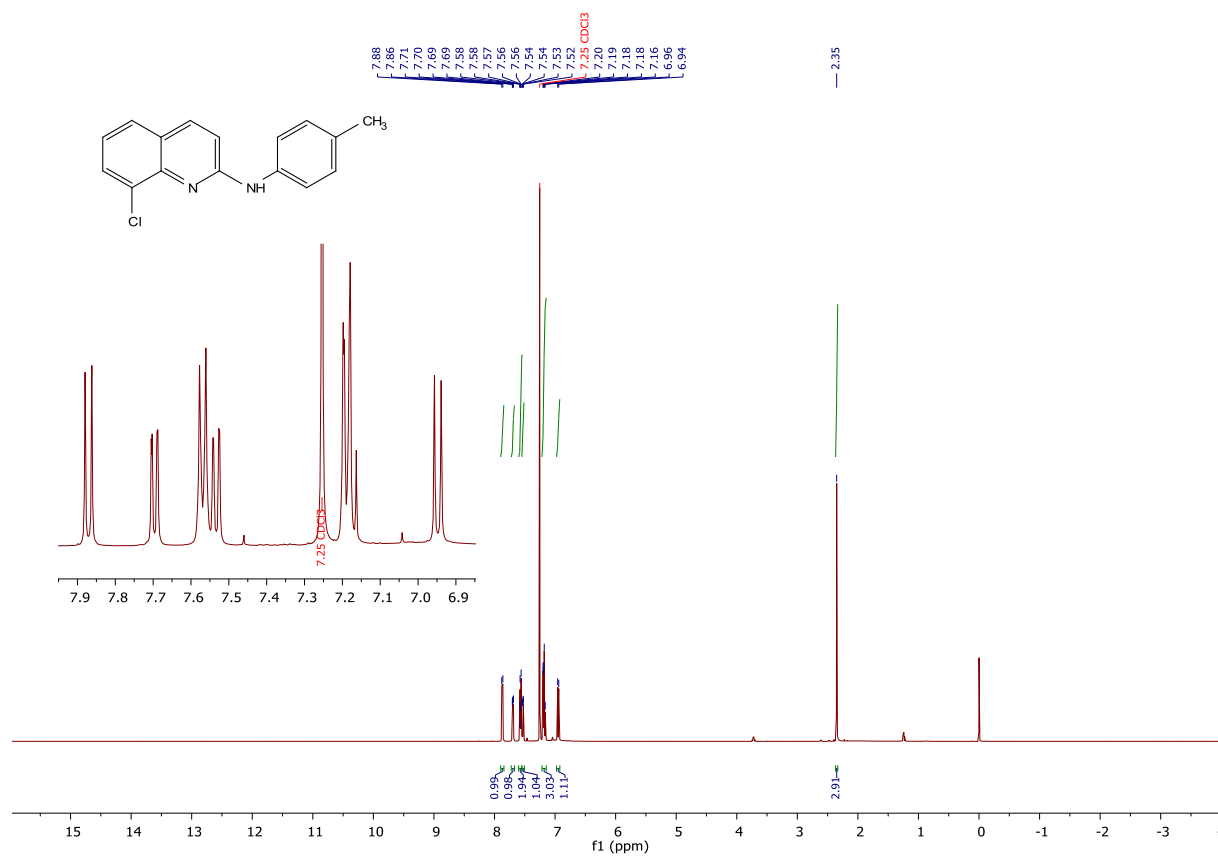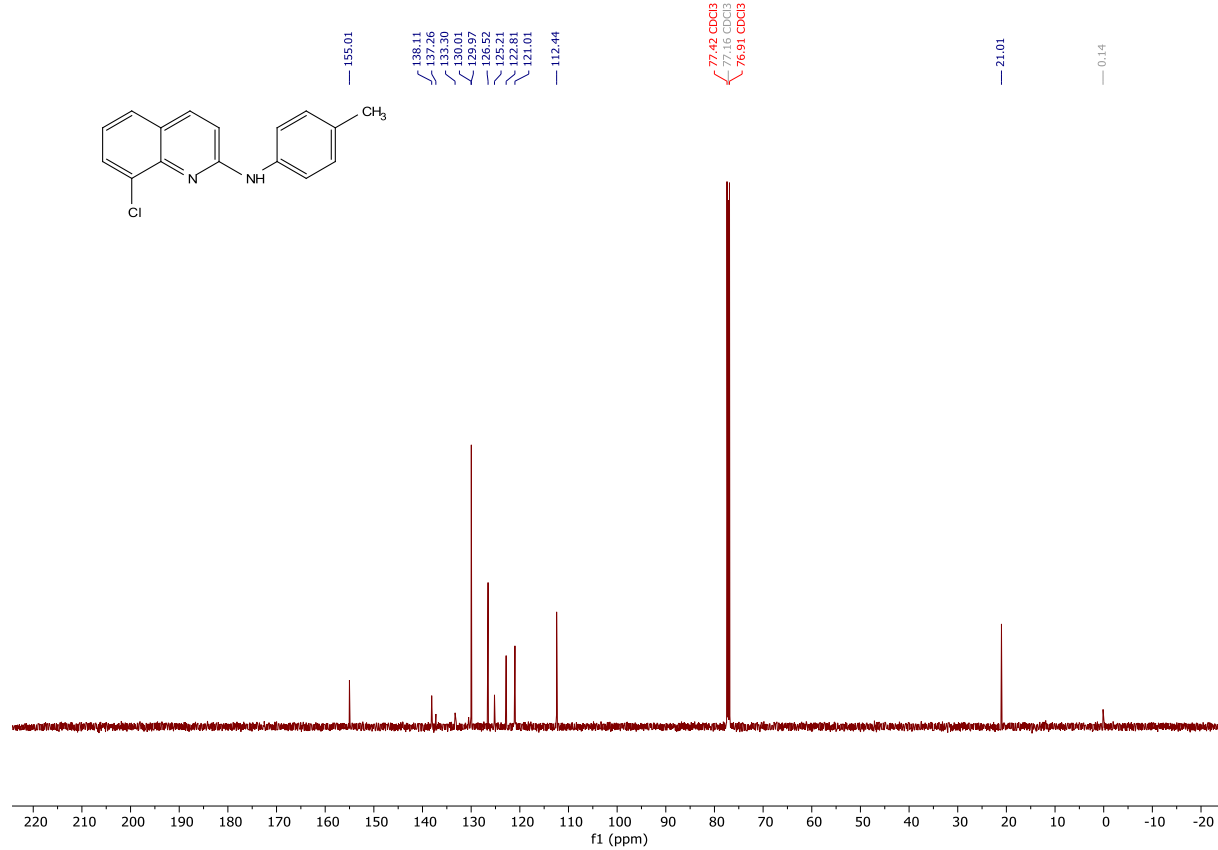

<sup>1</sup>H NMR and <sup>13</sup>C NMR 2-morpholinobenzo[d]oxazole (10)

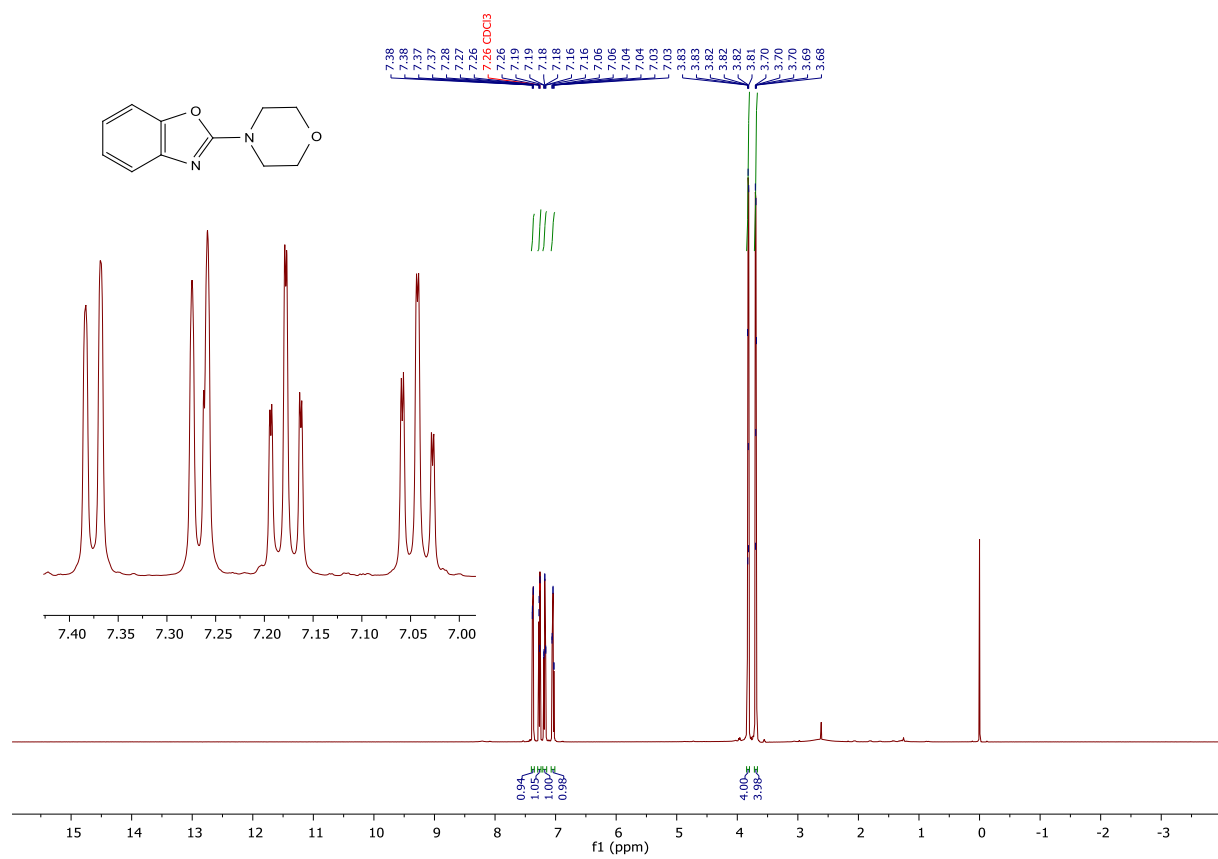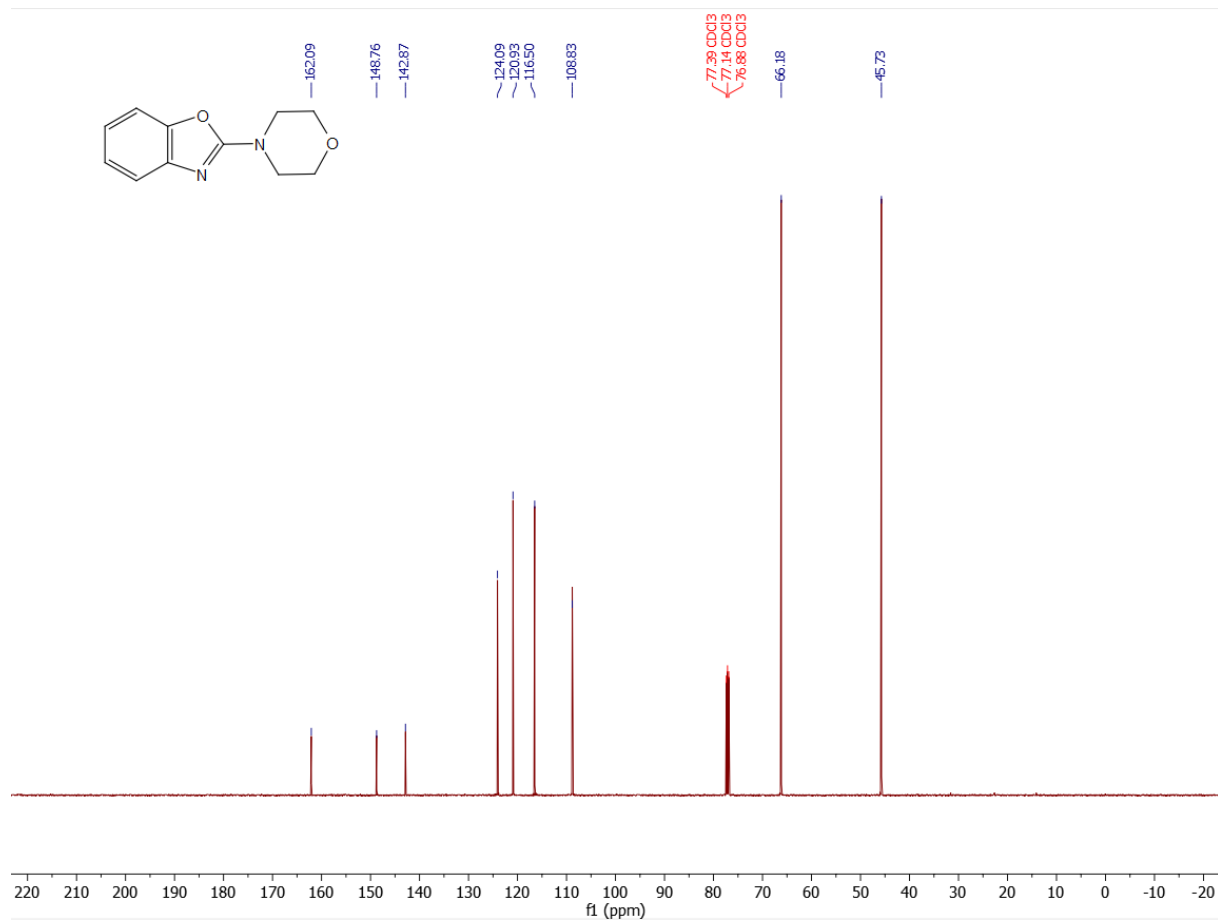

**<sup>1</sup>H NMR and <sup>13</sup>C NMR 4-(4-(pyridin-2-ylmethyl)phenyl)morpholine (11)**

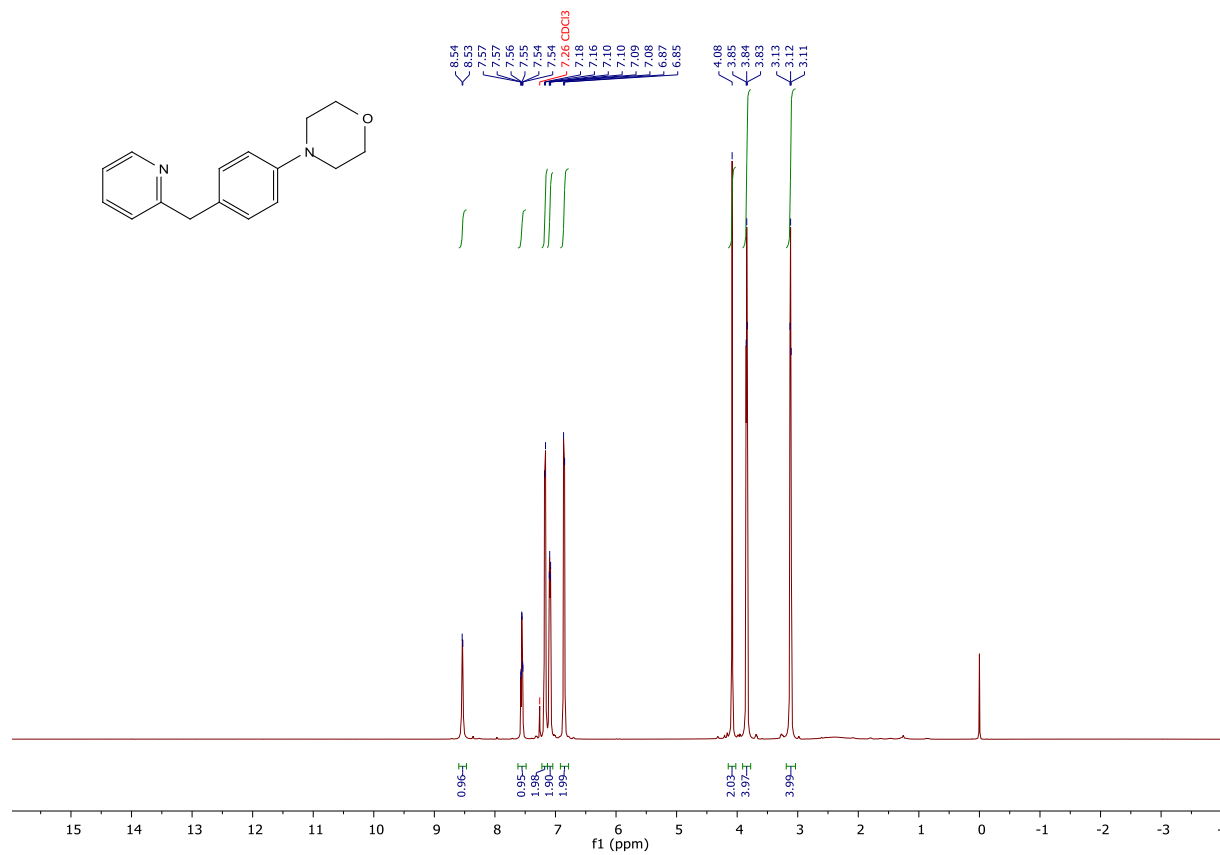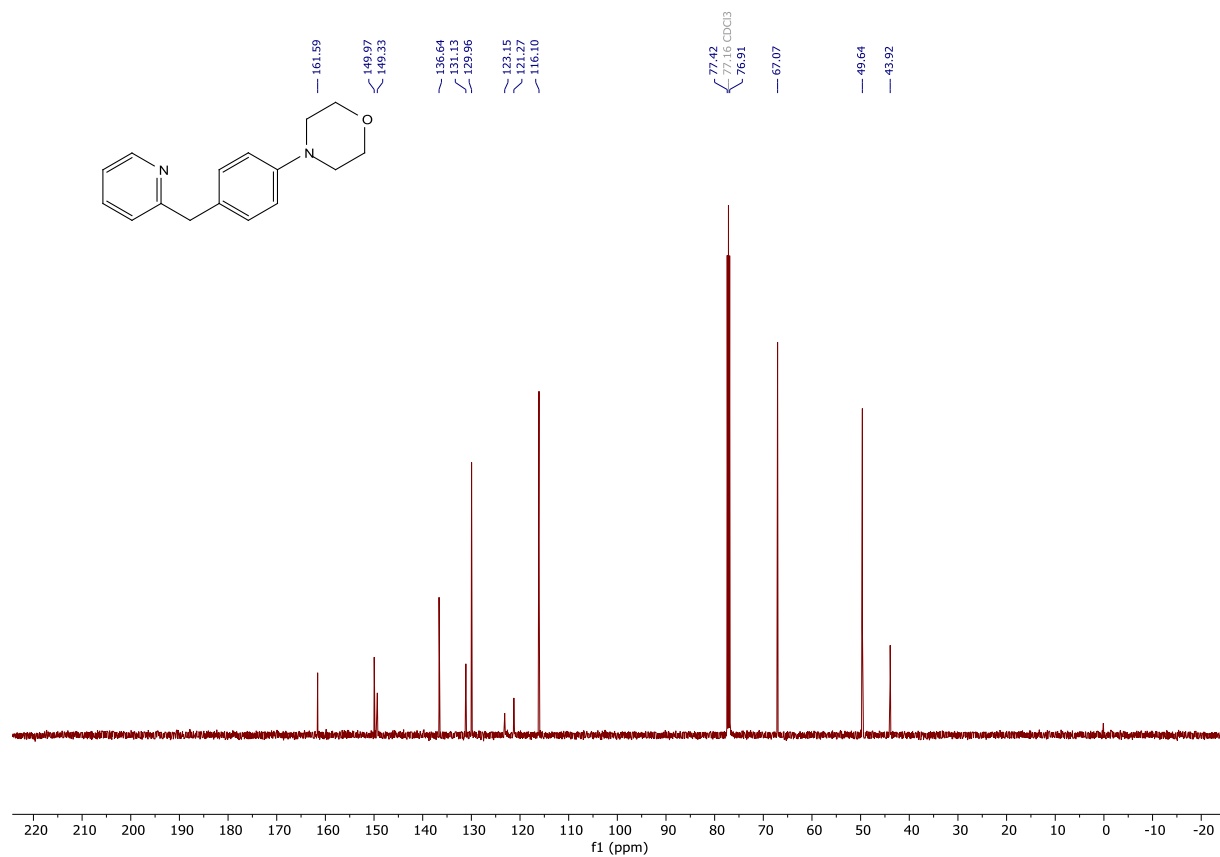

<sup>1</sup>H NMR and <sup>13</sup>C NMR 4-(*p*-tolyl)morpholine (**12**)

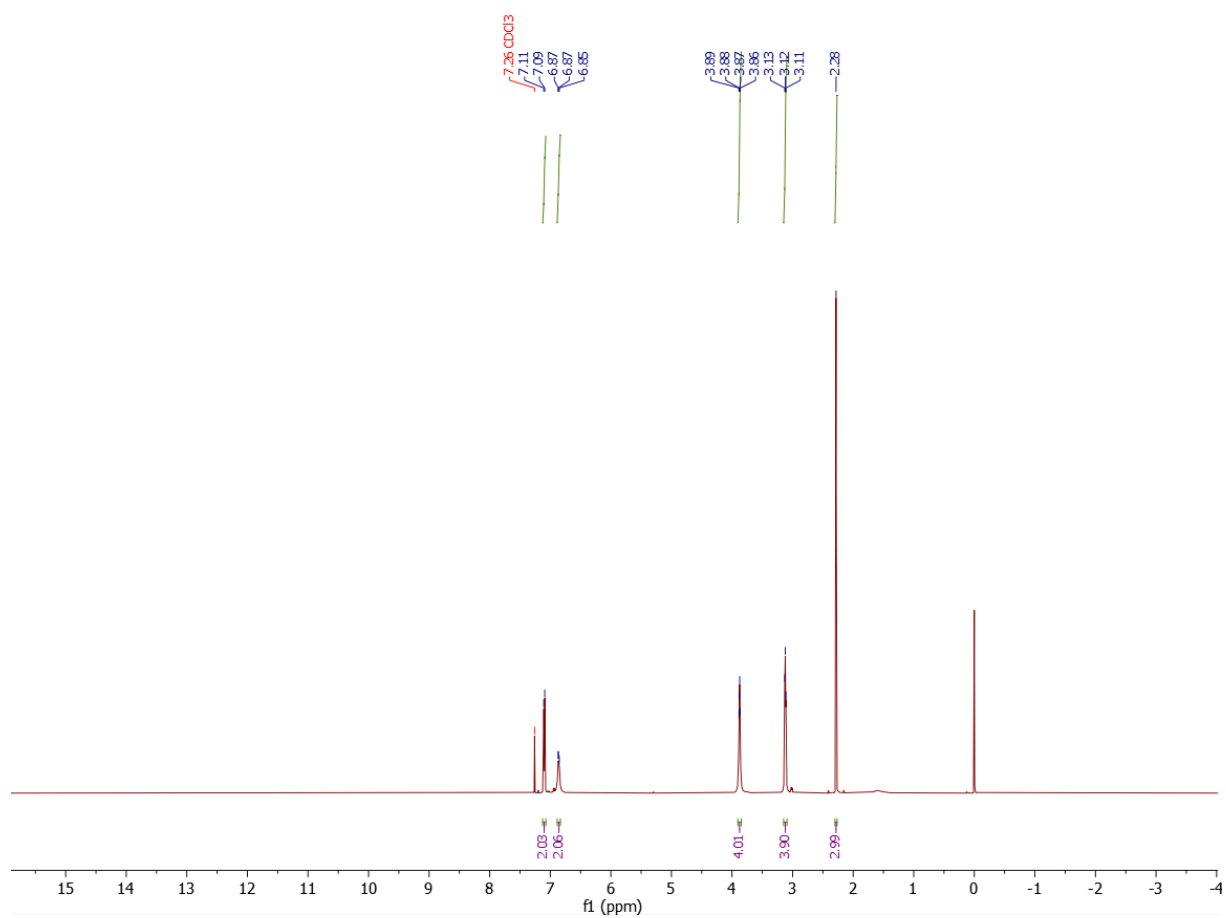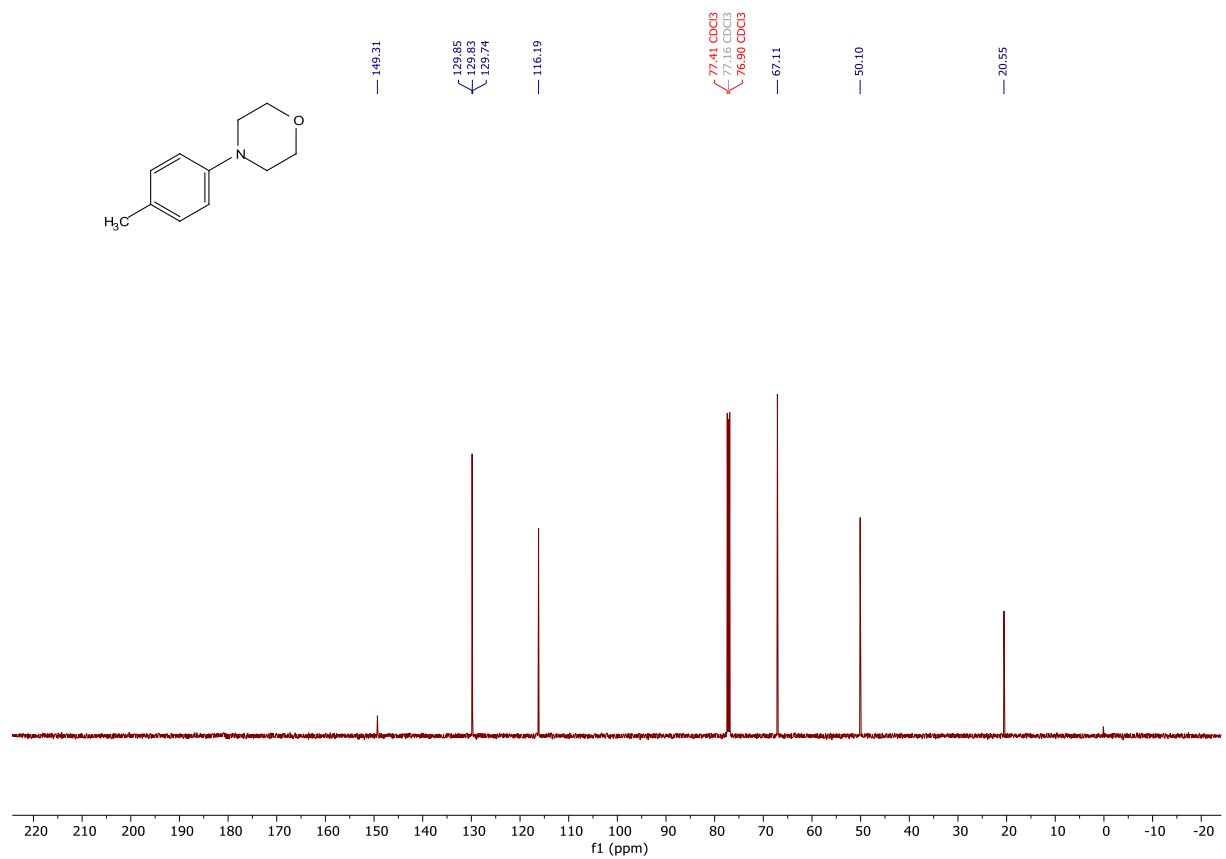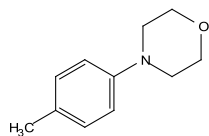

<sup>1</sup>H NMR and <sup>13</sup>C NMR 4-(4-fluorophenyl)morpholine (13)

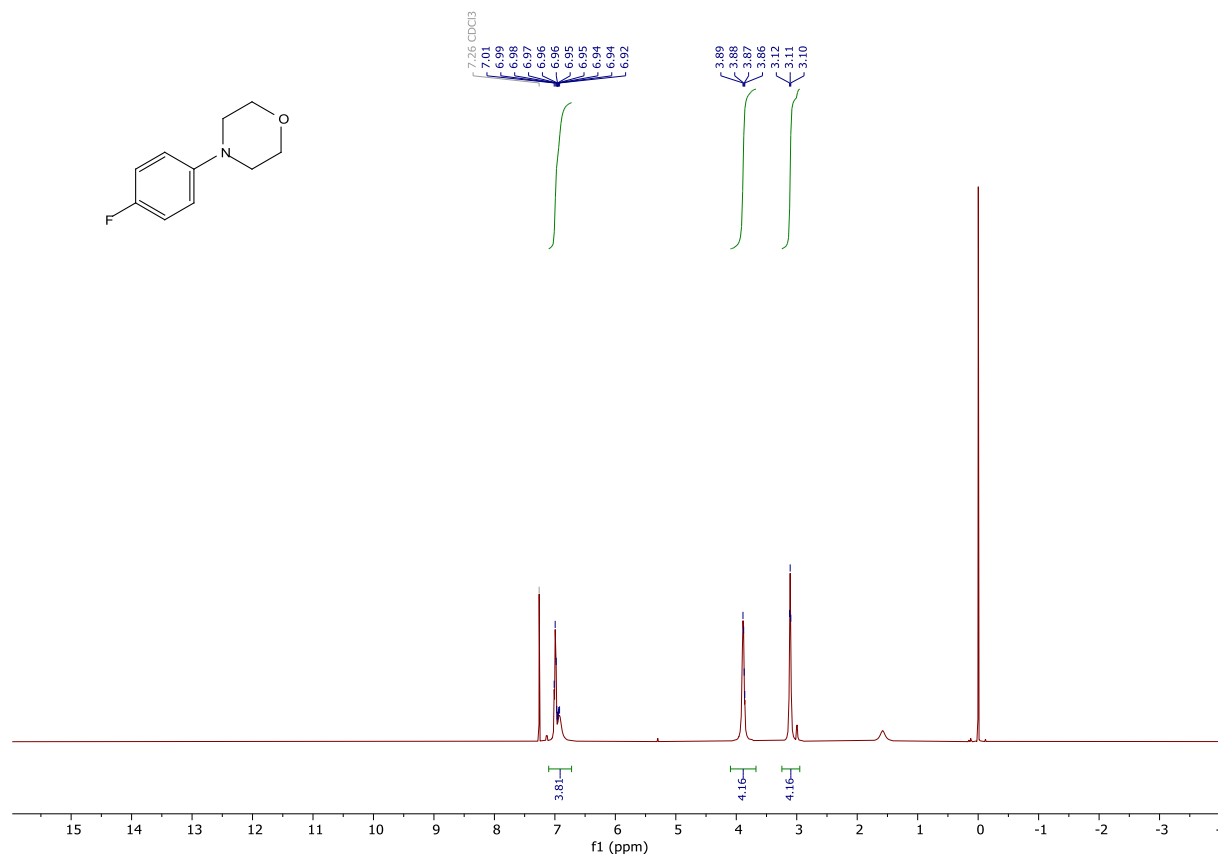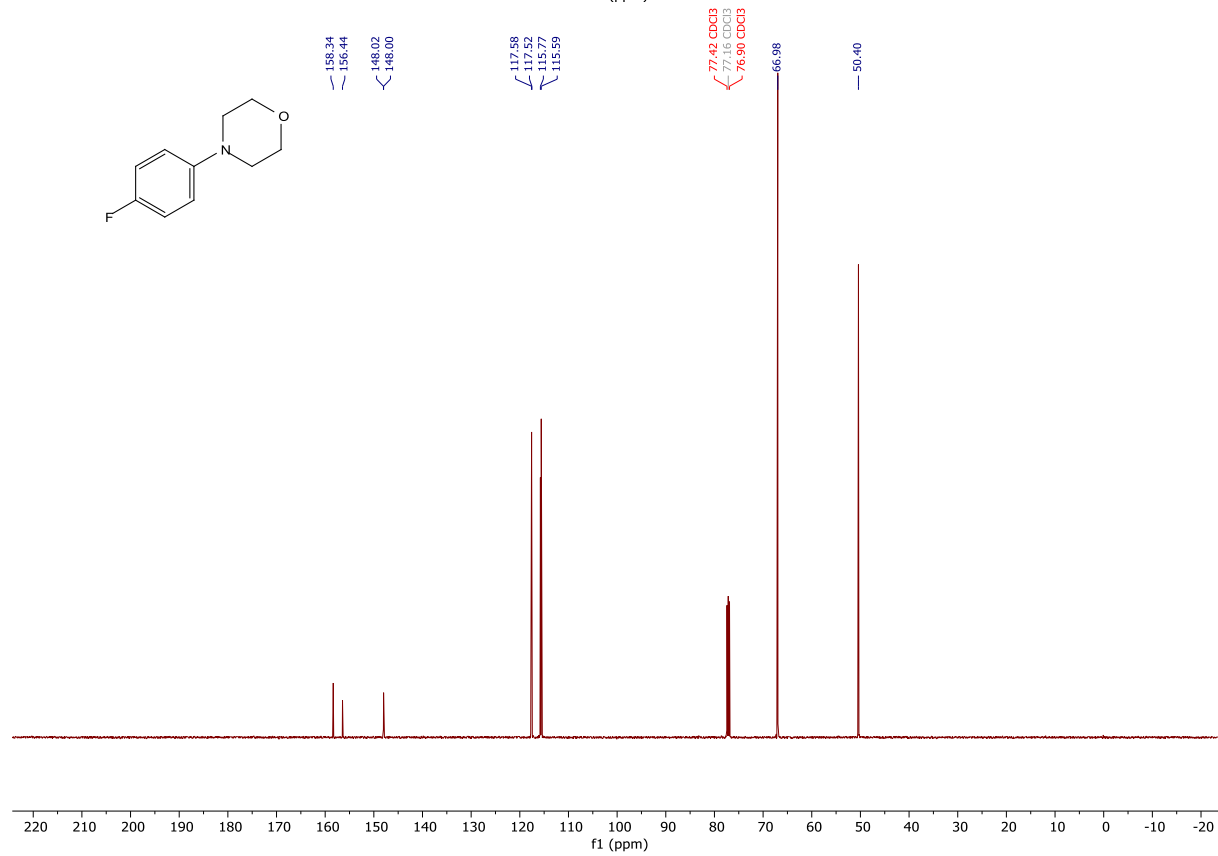



<sup>1</sup>H NMR and <sup>13</sup>C NMR 4-morpholinobenzonitrile (**14**)

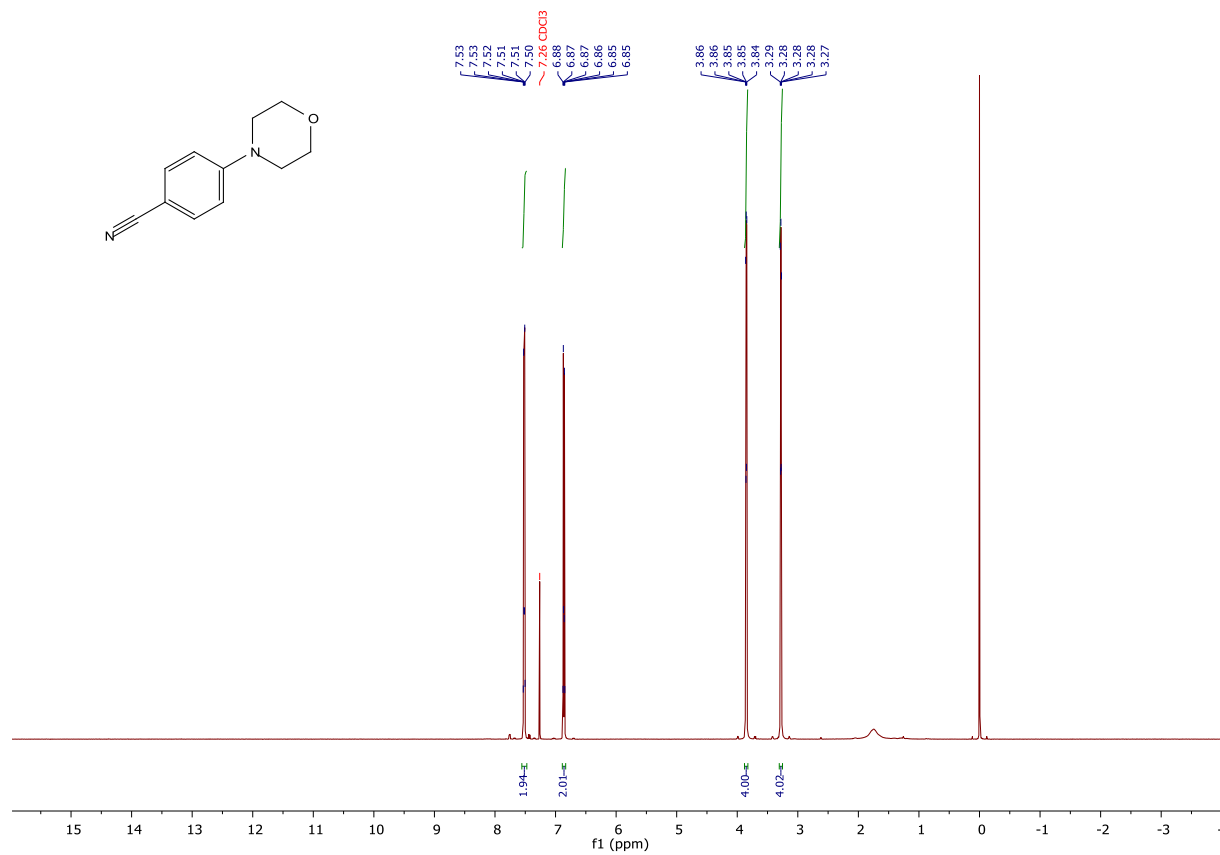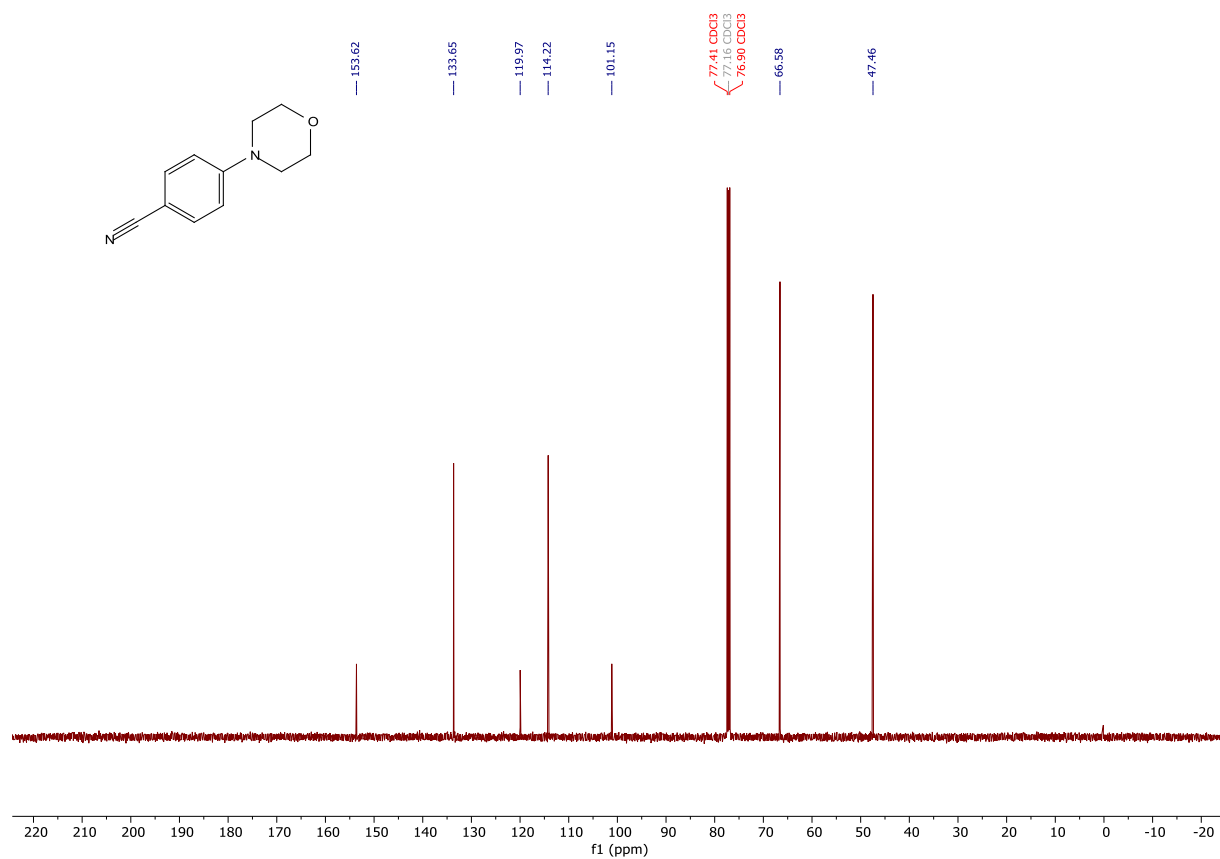

Supplement: d2gc01460b2.pdf [file d2gc01460b2.pdf]
