# Supplementary figures and images for: Parallel mechanochemical optimization – Buchwald–Hartwig C–N coupling as a test case
Source: Royal Society of Chemistry journal article supplement (doi:10.1039/d2gc01460b), 2022-01-01

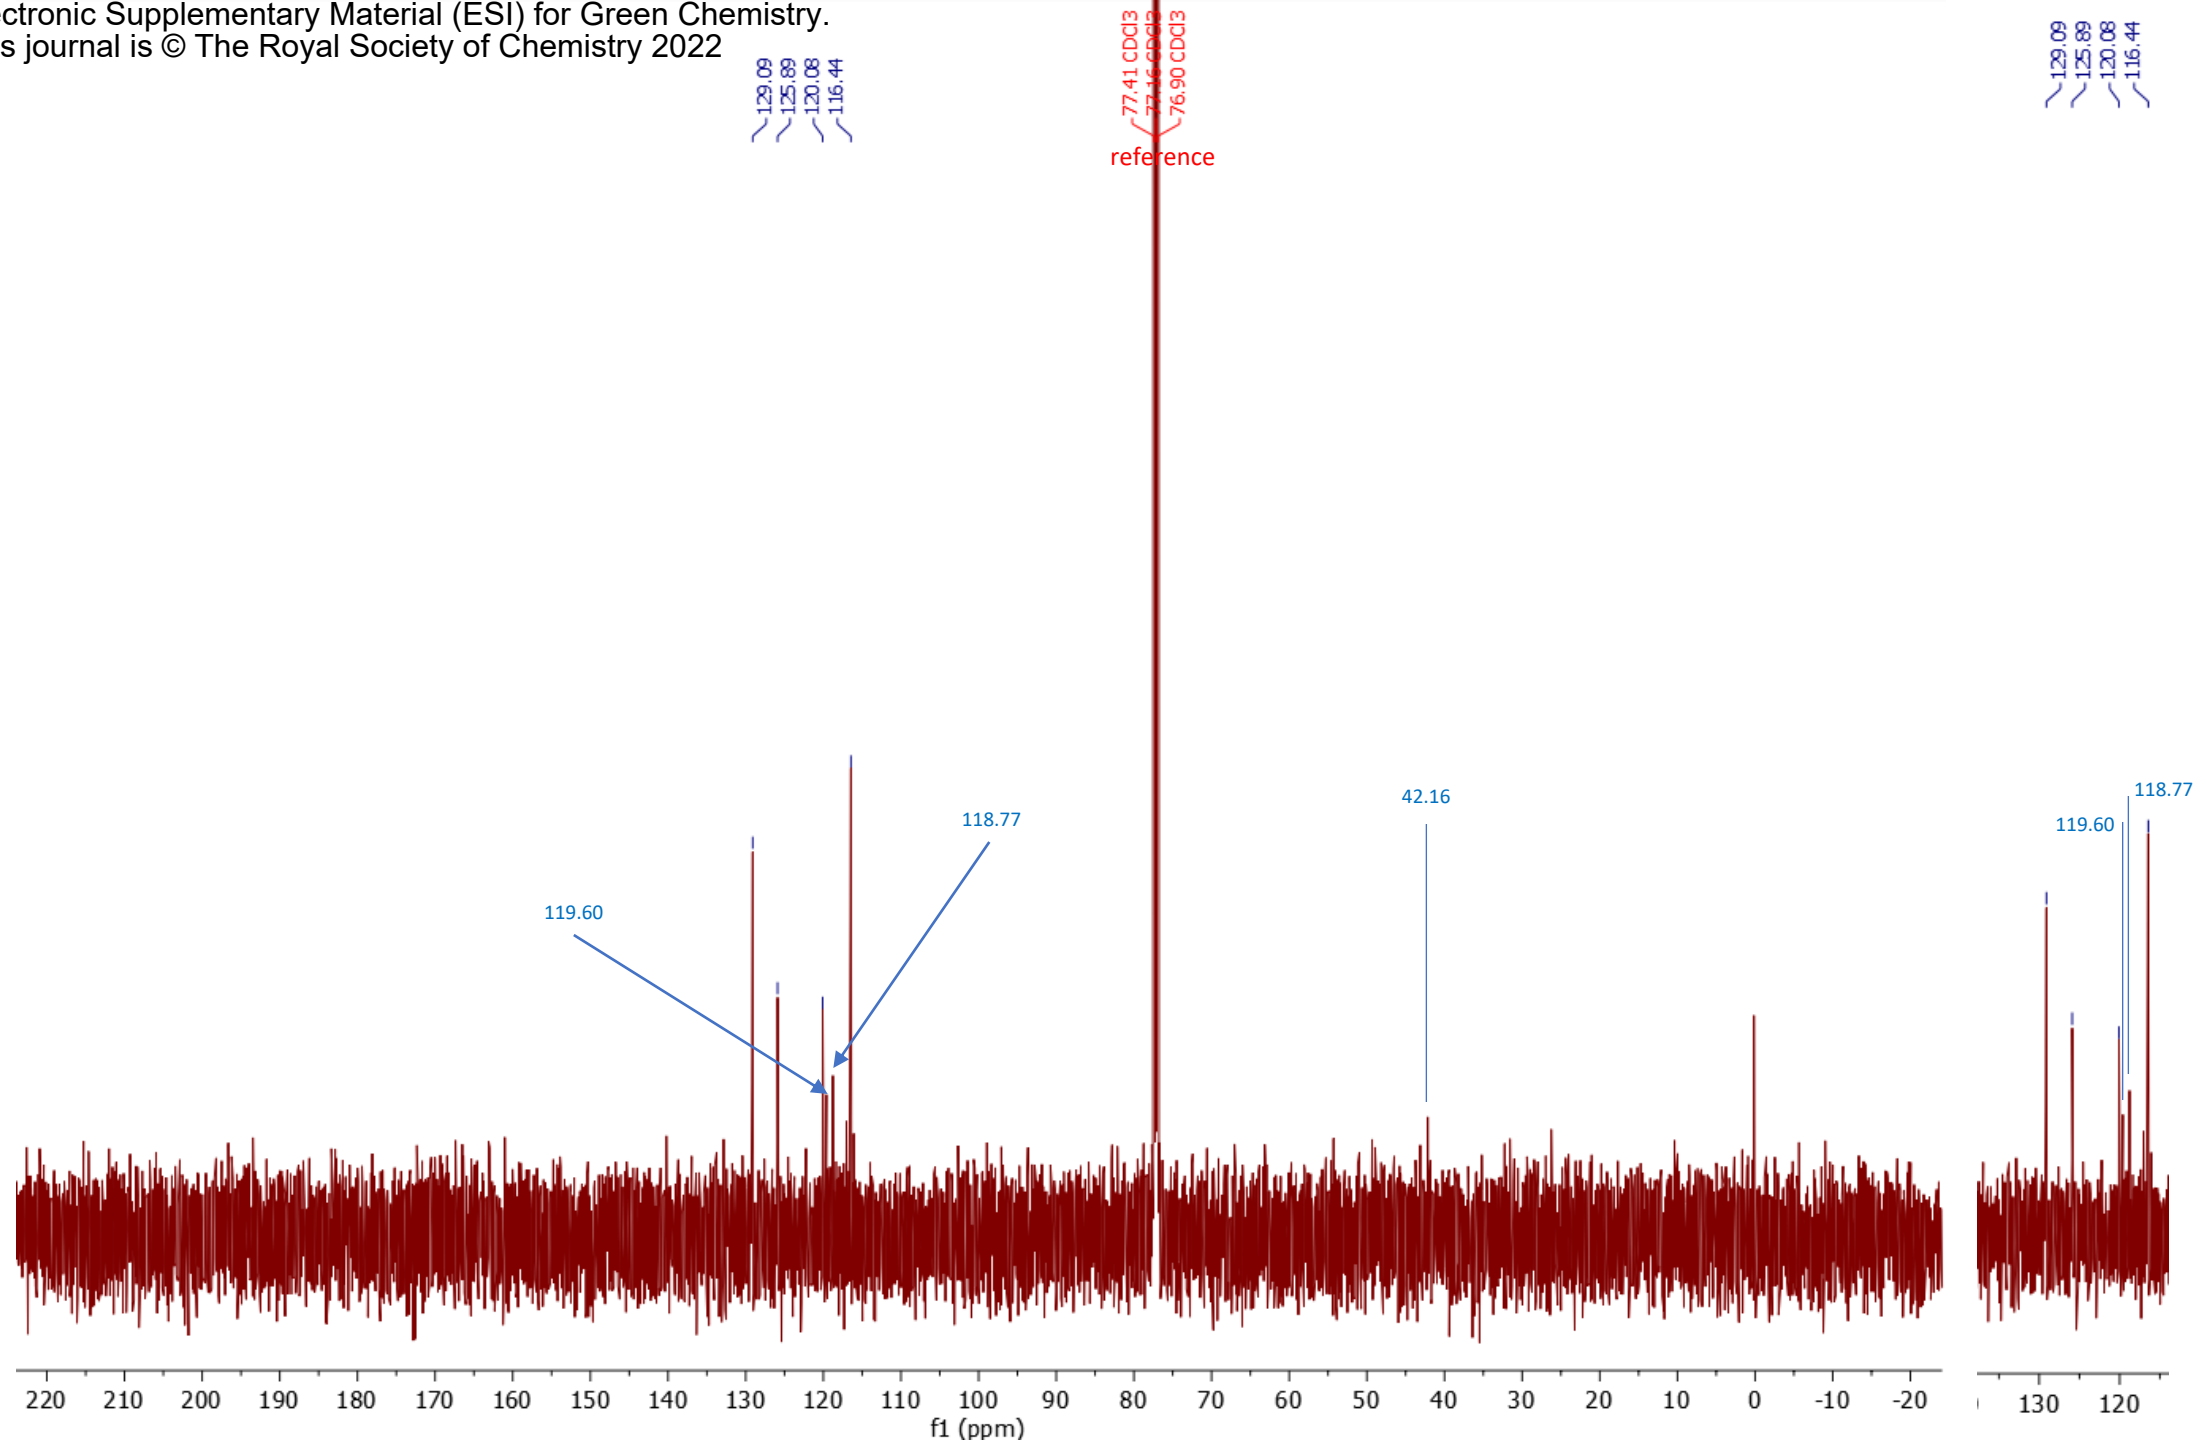

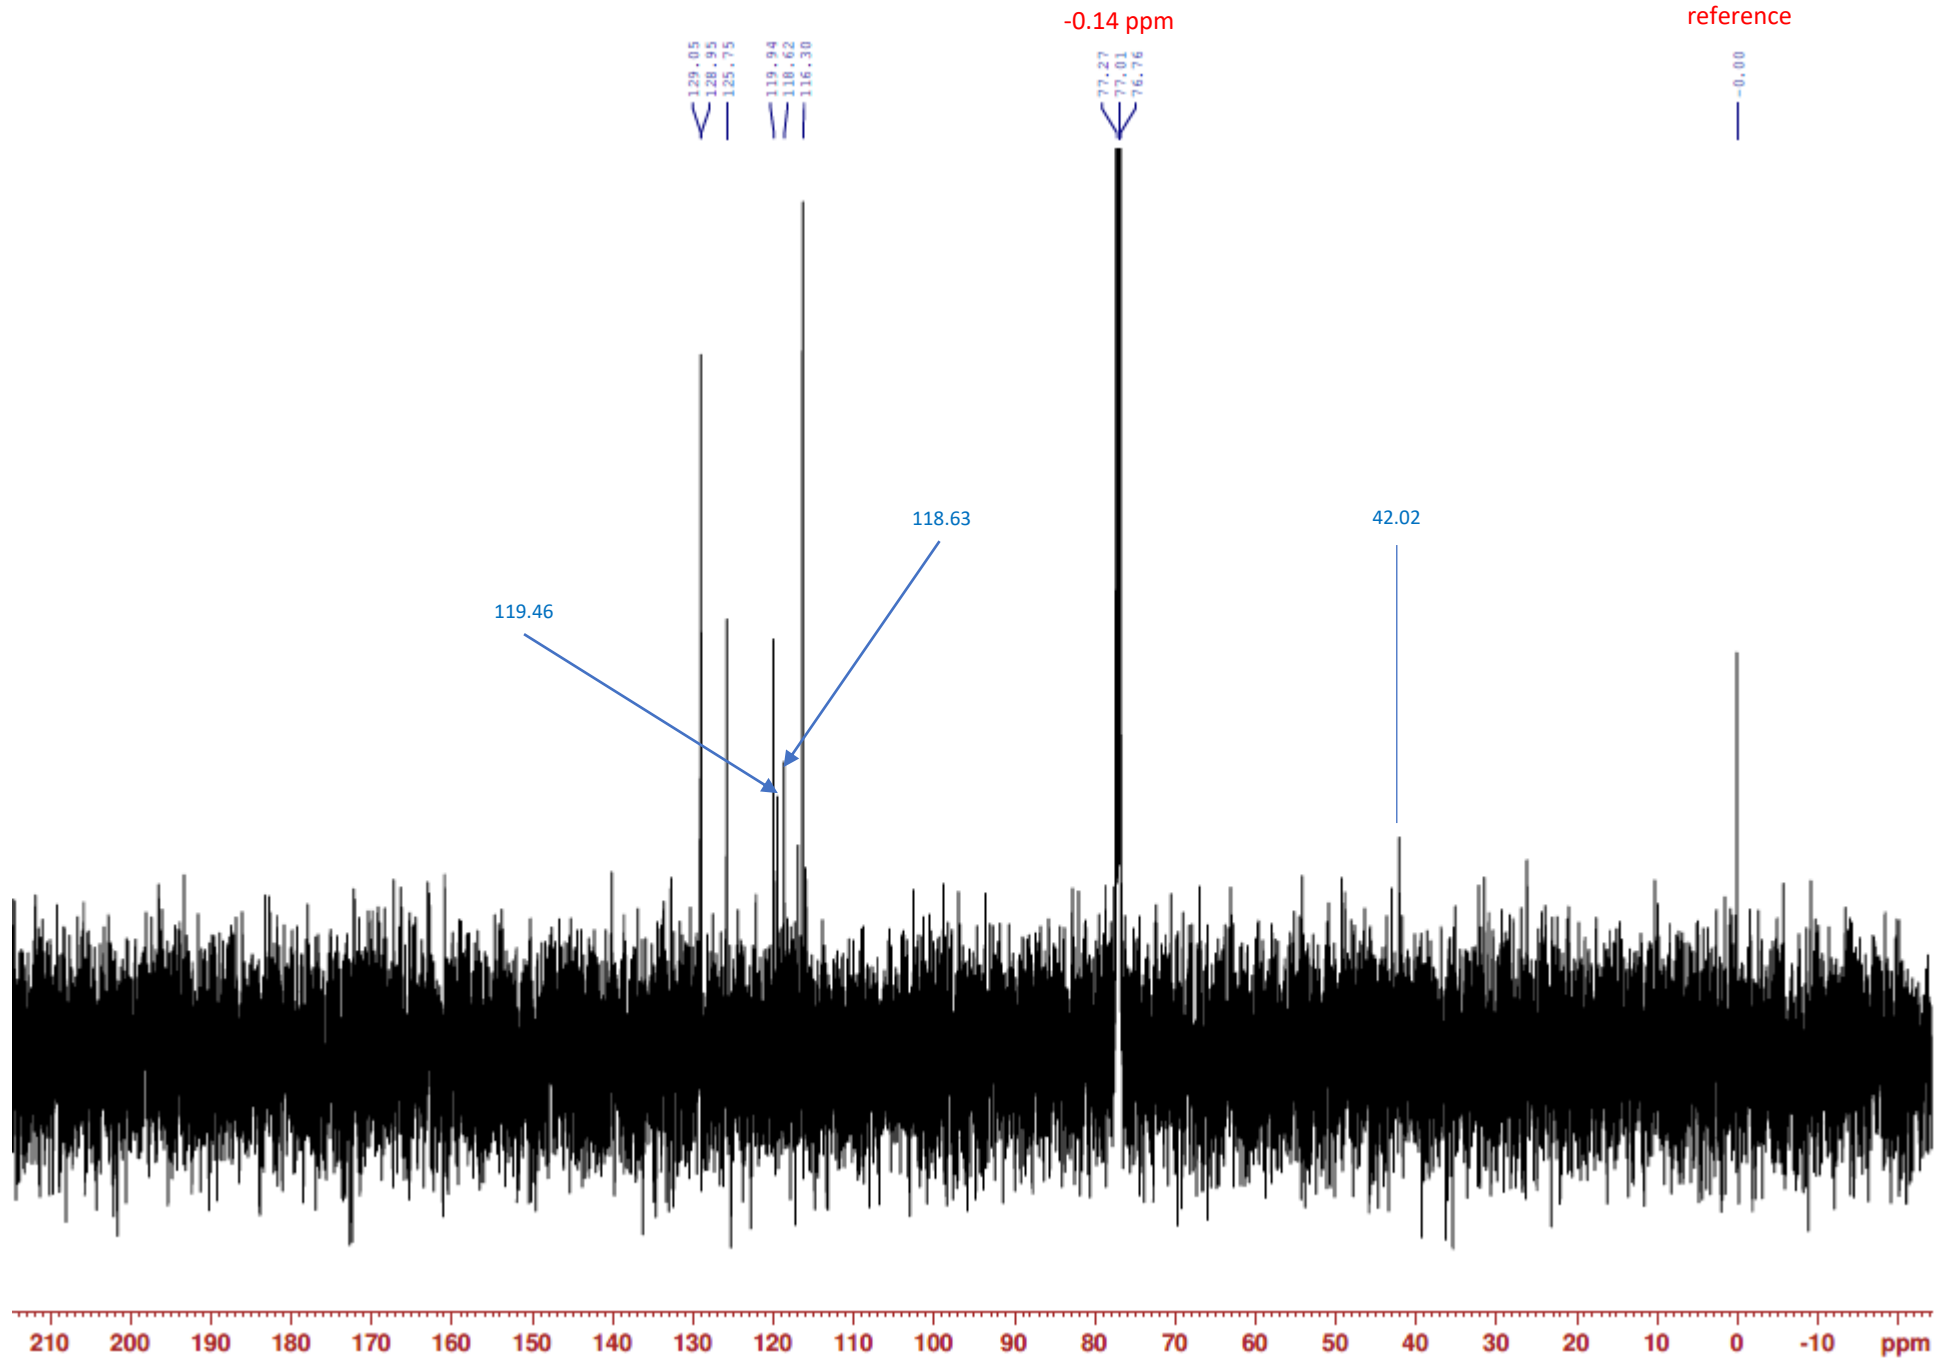

Supplement: d2gc01460b1.pdf [file d2gc01460b1.pdf]
